# Supplementary material for: Chelation-assisted Pd-catalysed ortho-selective oxidative C–H/C–H cross-coupling of aromatic carboxylic acids with arenes and intramolecular Friedel–Crafts acylation: one-pot formation of fluorenones
Source: Royal Society of Chemistry journal article supplement (doi:10.1039/c6cc00103c), 2016-01-01

## ***Supporting Information***

### **Chelation-assisted Pd-catalysed *ortho*-selective oxidative C–H/C–H cross-coupling of aromatic carboxylic acids with arenes and intramolecular Friedel-Crafts acylation: one-pot formation of fluorenones**

Denan Sun, Bijin Li, Jingbo Lan,\* Quan Huang and Jingsong You\*

*Key Laboratory of Green Chemistry and Technology of Ministry of Education,  
College of Chemistry, and State Key Laboratory of Biotherapy, West China Medical  
School, Sichuan University, 29 Wangjiang Road, Chengdu 610064, PR China*

*Fax: 86-28-85412203; E-mail: [jingbolan@scu.edu.cn](mailto:jingbolan@scu.edu.cn); [jsyou@scu.edu.cn](mailto:jsyou@scu.edu.cn)*

## Table of Contents

|                                                                   |     |
|-------------------------------------------------------------------|-----|
| I. General remarks.....                                           | S3  |
| II. Optimization of the synthesis of fluorenones.....             | S3  |
| III. General procedure for the synthesis of flureones .....       | S6  |
| IV. Mechanistic study.....                                        | S6  |
| V. UV-Vis absorption and Emission spectra of <b>6</b> .....       | S8  |
| VI. Experimental data for the described substances.....           | S8  |
| VII. References.....                                              | S19 |
| VIII. Copies of $^1\text{H}$ and $^{13}\text{C}$ NMR spectra..... | S20 |

## I. General Remarks

NMR spectra were obtained on a Bruker AV II-400 MHz spectrometer. The  $^1\text{H}$  NMR (400 MHz) chemical shifts were measured relative to  $\text{CDCl}_3$ , TMS or  $\text{DMSO}-d_6$  as the internal reference ( $\text{CDCl}_3$ :  $\delta = 7.26$  ppm; TMS:  $\delta = 0.00$  ppm;  $\text{DMSO}-d_6$ :  $\delta = 2.50$  ppm). The  $^{13}\text{C}$  NMR (100 MHz) chemical shifts were given using  $\text{CDCl}_3$  or  $\text{DMSO}-d_6$  as the internal standard ( $\text{CDCl}_3$ :  $\delta = 77.16$  ppm;  $\text{DMSO}-d_6$ :  $\delta = 39.52$  ppm). High-resolution mass spectra (HRMS) were obtained with a Waters-Q-TOF-Premier (ESI). Melting points were determined with XRC-1 and are uncorrected. Absorption spectra were obtained on HITACHI U-2910 spectrometer. Fluorescence spectra and absolute quantum yields were collected on a Horiba Jobin Yvon-Edison Fluoromax-4 fluorescence spectrometer with a calibrated integrating sphere system.

Unless otherwise noted, all reagents were obtained from commercial suppliers and used without further purification.  $\text{Pd}(\text{OAc})_2$  was purchased from Shanxi Kaida Chemical Engineering (China) CO., Ltd. All syntheses and manipulations were carried out under air atmosphere. Biphenyl-2-carboxylic acid was prepared according to the literature procedures.<sup>[1]</sup> 2,3,4,5,6-Pentadeuteriobenzoic acid (benzoic- $d_5$  acid) was prepared according to the known procedure.<sup>[2]</sup>

## II. Optimization of the synthesis of fluorenone

A flame-dried Schlenk test tube with a magnetic stirring bar was charged with benzoic acid **1a** (0.2-0.4 mmol), benzene **2a** (0.8-10 mmol), catalyst (10 mol%), oxidant (3.0 equiv), ligand and acid under an air atmosphere. The resulting mixture was stirred for 5 min at room temperature, and then heated at 30-100 °C for 24 h. The resulting solution was cooled to ambient temperature, diluted with 20 mL of  $\text{CH}_2\text{Cl}_2$ , filtered through a celite pad, and washed with 10-20 mL of  $\text{CH}_2\text{Cl}_2$ . The combined organic extracts were concentrated and the resulting residue was purified by column chromatography on silica gel (petroleum ether/ethyl acetate = 20/1, v/v) to provide the desired product **3a**.

**Table S1. Screening Catalyst<sup>a</sup>**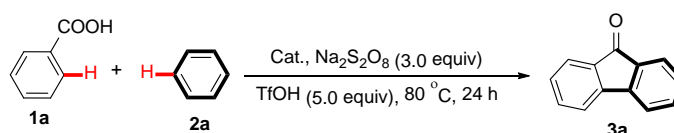

| Entry | Catalyst                                          | Yield (%) <sup>b</sup> |
|-------|---------------------------------------------------|------------------------|
| 1     | Cu(OAc) <sub>2</sub> .H <sub>2</sub> O            | n.d.                   |
| 2     | PdCl <sub>2</sub>                                 | n.d.                   |
| 3     | Pd(Ph <sub>3</sub> ) <sub>4</sub>                 | trace                  |
| 4     | Pd(Ph <sub>3</sub> ) <sub>2</sub> Cl <sub>2</sub> | n.d.                   |
| 5     | Pd(OAc) <sub>2</sub>                              | 45                     |
| 6     | [Cp*RhCl <sub>2</sub> ] <sub>2</sub>              | n.d.                   |
| 7     | Pd(TFA) <sub>2</sub>                              | 40                     |
| 8     | Pd <sub>2</sub> (dba) <sub>3</sub>                | trace                  |

<sup>a</sup>Reaction conditions: **1a** (0.2 mmol), **2a** (10 mmol), catalyst (10 mol%), Na<sub>2</sub>S<sub>2</sub>O<sub>8</sub> (3.0 equiv), TfOH (5.0 equiv) at 80 °C under an air atmosphere for 24 h. <sup>b</sup>Yield of isolated product. TfOH = trifluoromethanesulfonic acid. TFA = trifluoroacetic acid. dba = dibenzylideneacetone.

**Table S2. Screening Acid<sup>a</sup>**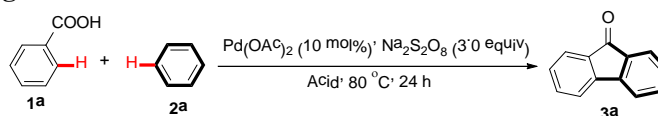

| Entry          | Acid                  | Yield (%) <sup>b</sup> |
|----------------|-----------------------|------------------------|
| 1              | HOAc                  | nd                     |
| 2              | TFA                   | nd                     |
| 3              | PivOH                 | nd                     |
| 4              | MSA                   | nd                     |
| 5              | TsOH.H <sub>2</sub> O | 20                     |
| 6              | TfOH                  | 45                     |
| 7 <sup>c</sup> | TfOH                  | 38                     |

<sup>a</sup>Reaction conditions: **1a** (0.2 mmol), **2a** (10 mmol), Pd(OAc)<sub>2</sub> (10 mol%), Na<sub>2</sub>S<sub>2</sub>O<sub>8</sub> (3.0 equiv), acid (5.0 equiv) at 80 °C under an air atmosphere for 24 h. <sup>b</sup>Yield of isolated product. <sup>c</sup>TfOH (4.0 equiv). MSA = methanesulfonic acid. TsOH = *p*-toluenesulfonic acid. PivOH = trimethylacetic acid.

**Table S3. Screening Oxidant<sup>a</sup>**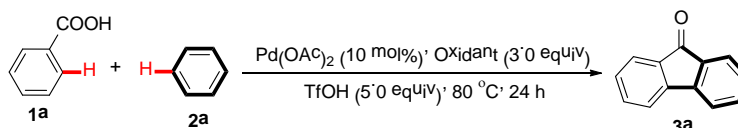

| Entry | Oxidant                                                       | Yield (%) <sup>b</sup> |
|-------|---------------------------------------------------------------|------------------------|
| 1     | K <sub>2</sub> S <sub>2</sub> O <sub>8</sub>                  | 40                     |
| 2     | Na <sub>2</sub> S <sub>2</sub> O <sub>8</sub>                 | 45                     |
| 3     | (NH <sub>4</sub> ) <sub>2</sub> S <sub>2</sub> O <sub>8</sub> | 35                     |



|    |                                 |        |
|----|---------------------------------|--------|
| 4  | AgOAc                           | 20     |
| 5  | Ag <sub>2</sub> CO <sub>3</sub> | trace. |
| 6  | Ag <sub>2</sub> O               | 30     |
| 7  | Cu(OAc) <sub>2</sub>            | n.d.   |
| 8  | PhI(OAc) <sub>2</sub>           | n.d.   |
| 9  | BQ                              | n.d.   |
| 10 | CuCl <sub>2</sub>               | n.d.   |

<sup>a</sup>Reaction conditions: **1a** (0.2 mmol), **2a** (10 mmol), Pd(OAc)<sub>2</sub> (10 mol%), oxidant (3.0 equiv), TfOH (5.0 equiv) at 80 °C under an air atmosphere for 24 h. <sup>b</sup>Yield of isolated product. BQ = benzoquinone.

**Table S4 Screening Temperature<sup>a</sup>**

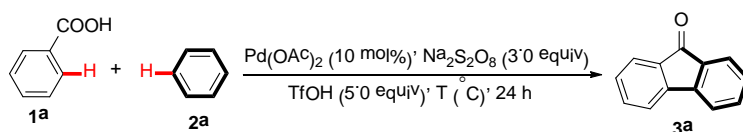

| Entry | T (°C) | Yield (%) <sup>b</sup> |
|-------|--------|------------------------|
| 1     | 30     | nd                     |
| 2     | 60     | trace                  |
| 3     | 70     | 35                     |
| 4     | 80     | 45                     |
| 5     | 90     | 40                     |
| 6     | 100    | trace                  |

<sup>a</sup>Reaction conditions: **1a** (0.2 mmol), **2a** (10 mmol), Pd(OAc)<sub>2</sub> (10 mol%), Na<sub>2</sub>S<sub>2</sub>O<sub>8</sub> (3.0 equiv), TfOH (5.0 equiv) under an air atmosphere for 24 h. <sup>b</sup>Yield of isolated product.

**Table S5. Screening Ligand<sup>a</sup>**

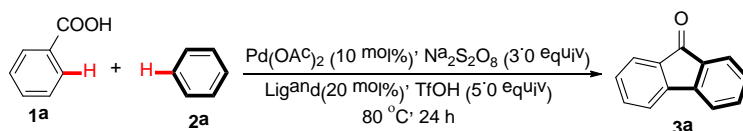

| Entry           | Ligand           | Yield (%) <sup>b</sup> |
|-----------------|------------------|------------------------|
| 1               | Ac-Gly-OH        | 40                     |
| 2               | Ac-Ile-OH        | 45                     |
| 3               | Ac-Val-OH        | 35                     |
| 4               | Boc-Ile-OH       | trace                  |
| 5               | Boc-Gly-OH       | trace.                 |
| 6               | Ac-Leu-OH        | 30                     |
| 7               | PPh <sub>3</sub> | n.d.                   |
| 8 <sup>c</sup>  | DMSO             | 60                     |
| 9               | MeCN             | n.d.                   |
| 10 <sup>d</sup> | Ac-Ile-OH/DMSO   | 78                     |

<sup>a</sup>Reaction conditions: **1a** (0.2 mmol), **2a** (10 mmol), Pd(OAc)<sub>2</sub> (10 mol%), Na<sub>2</sub>S<sub>2</sub>O<sub>8</sub> (3.0 equiv), TfOH (5.0 equiv), ligand at 80 °C under an air atmosphere for 24 h. <sup>b</sup>Yield of isolated product.

<sup>c</sup>DMSO (2.0 equiv). <sup>d</sup>Ac-Ile-OH (20mol%), DMSO (2.0 equiv). Ac-Gly-OH = 2-acetamidoacetic acid. Ac-Ile-OH = 2-acetamido-3-methylpentanoic acid. Ac-Leu-OH = 2-acetamido-4-methylpentanoic acid. Ac-Val-OH = 2-acetamido-3-methylbutanoic acid. Boc-Gly-OH = 2-((tert-butoxycarbonyl)amino)acetic acid. Boc-Ile-OH = 2-((tert-butoxycarbonyl)amino)-3-methylpentanoic acid. DMSO = dimethyl sulfoxide.

**Table S6. Screening the Amount of Benzene<sup>a</sup>**

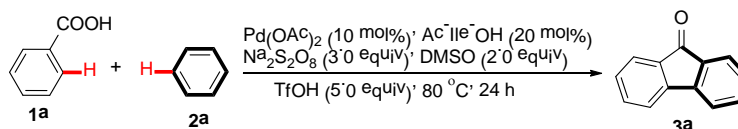

| Entry | <b>1a</b> (mmol) | <b>2a</b> (mmol) | Yield (%) <sup>b</sup> |
|-------|------------------|------------------|------------------------|
| 1     | 0.2              | ~10.0 (1.0 ml)   | 78                     |
| 2     | 0.2              | ~5.0 (0.5 ml)    | 79                     |
| 3     | 0.2              | ~2.0 (0.2 ml)    | 75                     |
| 4     | 0.2              | ~1.0 (0.1 ml)    | 75                     |
| 5     | 0.4              | 1.6 (0.15 ml)    | 82                     |

<sup>a</sup>Reaction conditions: **1a** (0.2~0.4 mmol), **2a** (1.0~10.0 mmol),  $\text{Pd}(\text{OAc})_2$  (10 mol%), Ac-Ile-OH (20 mol%),  $\text{Na}_2\text{S}_2\text{O}_8$  (3.0 equiv), TfOH (5.0 equiv) under an air atmosphere for 24 h. <sup>b</sup>Yield of isolated product.

### III. General procedure for the synthesis of fluorenones

A flame-dried Schlenk test tube with a magnetic stirring bar was charged with benzoic acids (0.4 mmol), arenes (1.6 mmol, 4.0 equiv),  $\text{Pd}(\text{OAc})_2$  (10 mol%),  $\text{Na}_2\text{S}_2\text{O}_8$  (3.0 equiv), Ac-Ile-OH (0.2 equiv), DMSO (2.0 equiv) and HOTf (2.0 mmol, 5 equiv) under an air atmosphere. The resulting mixture was stirred for 5 min at room temperature, and then heated at 80 °C for 24 h. The resulting solution was cooled to ambient temperature, diluted with 20 mL of  $\text{CH}_2\text{Cl}_2$ , filtered through a celite pad, and washed with 10-20 mL of  $\text{CH}_2\text{Cl}_2$ . The combined organic extracts were concentrated and the resulting residue was purified by column chromatography on silica gel to provide the desired product.

### IV. Mechanism study

#### 1. Kinetic isotope experiments

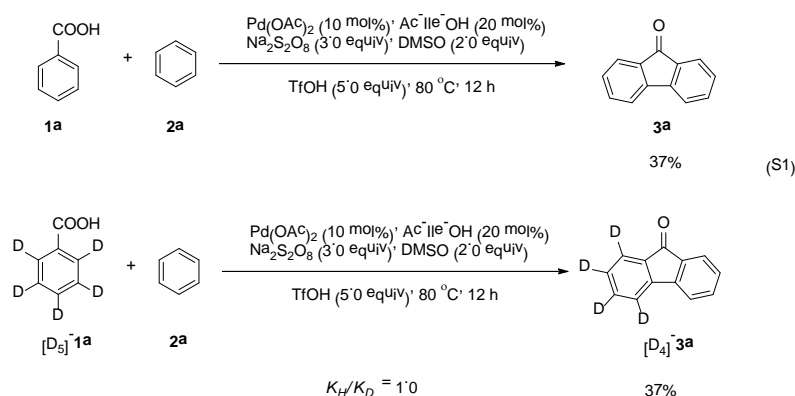

Two sets of reactions were carried out in a parallel manner. In each case benzene was allowed to react with benzoic acid and 2,3,4,5,6-pentadeuteriobenzoic acid (benzoic- $d_5$  acid), respectively. The sealed tubes were screw-capped and heated to 80 °C (oil bath). After being stirred for 12 h, the resulting solution was cooled to ambient temperature, diluted with 20 mL of  $\text{CH}_2\text{Cl}_2$ , filtered through a celite pad, and washed with 10-20 mL of  $\text{CH}_2\text{Cl}_2$ . The combined organic extracts were concentrated and the resulting residue was purified by column chromatography on silica gel to provide the desired **3a** and **[D<sub>4</sub>]-3a** as yellow solid.

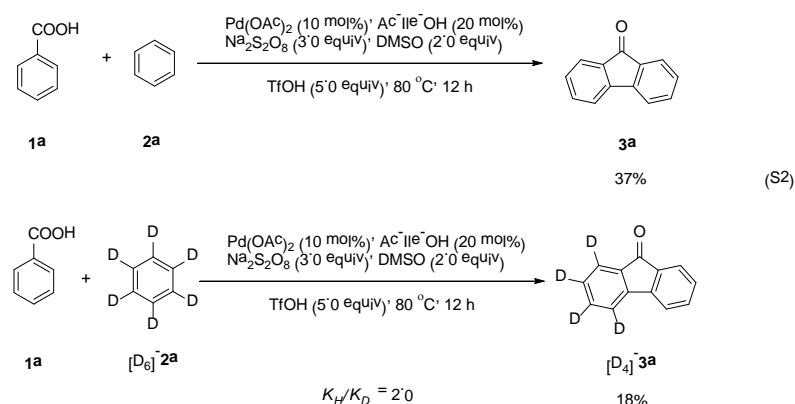

Two sets of reactions were carried out in a parallel manner. In each case benzoic acid was allowed to react with benzene and benzene- $d_6$ , respectively. The sealed tubes were screw-capped and heated to 80 °C (oil bath). After being stirred for 12 h, the resulting solution was cooled to ambient temperature, diluted with 20 mL of  $\text{CH}_2\text{Cl}_2$ , filtered through a celite pad, and washed with 10-20 mL of  $\text{CH}_2\text{Cl}_2$ . The combined organic extracts were concentrated and the resulting residue was purified by column chromatography on silica gel to provide the desired product **3a** and **[D<sub>4</sub>]-3a** as yellow solid.

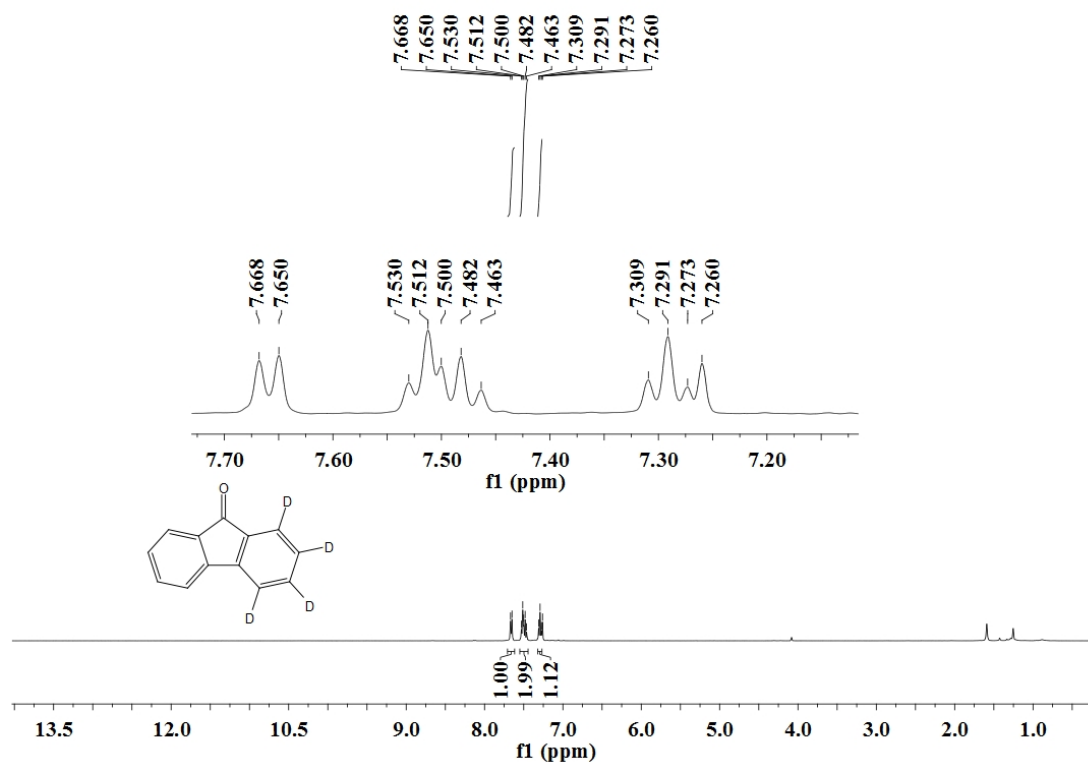

**Figure. S1.** Copy of  $^1\text{H}$  NMR spectra of  $[\text{D}_4]\text{-3a}$ .

## V. UV-Vis absorption and emission spectra of **6**.

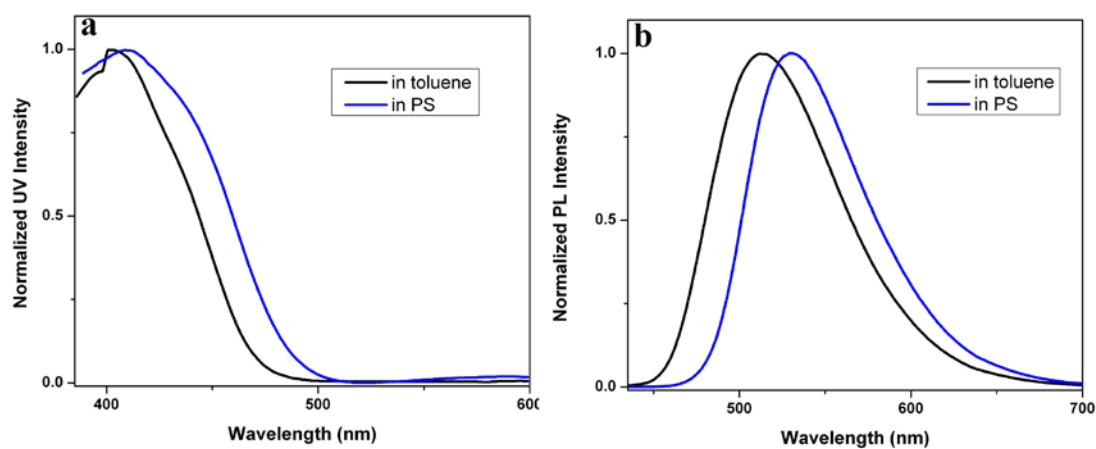

**Figure S2.** (a) UV-Vis absorption spectra of **6** in toluene ( $5.0 \times 10^{-5}$  M) and in PS film (5.0 wt%); (b) Emission spectra of **6** in toluene ( $5.0 \times 10^{-5}$  M) and in PS film (5.0 wt%).

## VI. Experimental data for the described substances.

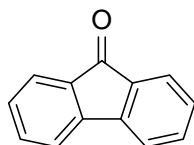

**9H-Fluoren-9-one (3a)**

Following the general procedure, the reaction mixture was heated at 80 °C for 24 h. Purification via silica gel column chromatography (petroleum ether/EtOAc = 50/1, v/v) afforded the desired product as a yellow solid (59.0 mg, 82%). M.p.: 83-85 °C. <sup>1</sup>H NMR (400 MHz, CDCl<sub>3</sub>): δ = 7.29 (t, *J* = 7.2 Hz, 2H), 7.48 (t, *J* = 7.2 Hz, 2H), 7.52 (d, *J* = 7.2 Hz, 2H), 7.66 (d, *J* = 7.2 Hz, 2H) ppm. <sup>13</sup>C NMR (100 MHz, CDCl<sub>3</sub>): δ = 120.4, 124.4, 129.2, 134.2, 134.8, 144.5, 194.1 ppm. HRMS (ESI<sup>+</sup>): calcd for C<sub>13</sub>H<sub>8</sub>NaO [M+Na]<sup>+</sup> 203.0473, found 203.0469.

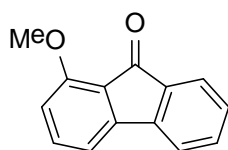

### 1-Methoxy-9H-fluoren-9-one (3b)

Following the general procedure, the reaction mixture was heated at 80 °C for 24 h. Purification via silica gel column chromatography (petroleum ether/EtOAc = 20/1, v/v) afforded the desired product as a yellow solid (67.2 mg, 80%). M.p.: 138-139 °C. <sup>1</sup>H NMR (400 MHz, CDCl<sub>3</sub>): δ = 3.98 (s, 3H), 6.82 (d, *J* = 8.4 Hz, 1H), 7.12 (d, *J* = 7.2 Hz, 1H), 7.28 (t, *J* = 7.2 Hz, 1H), 7.42-7.49 (m, 3H), 7.64 (d, *J* = 7.2 Hz, 1H) ppm. <sup>13</sup>C NMR (100 MHz, CDCl<sub>3</sub>): δ = 56.1, 113.0, 113.1, 120.2, 120.3, 124.0, 129.3, 134.0, 134.6, 136.9, 143.3, 146.6, 158.4, 192.1 ppm. HRMS (ESI<sup>+</sup>): calcd for C<sub>14</sub>H<sub>10</sub>NaO<sub>2</sub> [M+Na]<sup>+</sup> 233.0578, found 233.0576.

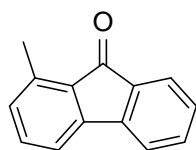

### 1-Methyl-9H-fluoren-9-one (3c)

Following the general procedure, the reaction mixture was heated at 80 °C for 24 h. Purification via silica gel column chromatography (petroleum ether/EtOAc = 20/1, v/v) afforded the desired product as a yellow solid (59.0 mg, 76%). M.p.: 98-100 °C. <sup>1</sup>H NMR (400 MHz, CDCl<sub>3</sub>): δ = 2.63 (s, 3H), 7.04 (d, *J* = 6.4 Hz, 1H), 7.28 (td, *J* = 7.2 Hz, *J* = 0.8 Hz, 1H), 7.31-7.36 (m, 2H), 7.46 (t, *J* = 7.6 Hz, 1H), 7.50 (d, *J* = 7.2 Hz, 1H), 7.62 (d, *J* = 7.6 Hz, 1H) ppm. <sup>13</sup>C NMR (100 MHz, CDCl<sub>3</sub>): δ = 18.0, 118.0, 120.2, 124.0, 129.0, 131.0, 132.0, 134.1, 134.5, 139.6, 144.0, 144.9, 195.3 ppm.

HRMS (ESI<sup>+</sup>): calcd for C<sub>14</sub>H<sub>10</sub>NaO [M+Na]<sup>+</sup> 217.0629, found 217.0625.

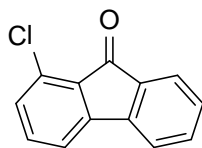

### 1-Chloro-9H-fluoren-9-one (3d)

Following the general procedure, the reaction mixture was heated at 80 °C for 24 h. Purification via silica gel column chromatography (petroleum ether/EtOAc = 20/1, v/v) afforded the desired product as a yellow solid (69.5 mg, 81%). M.p.: 138-140 °C. <sup>1</sup>H NMR (400 MHz, CDCl<sub>3</sub>): δ = 7.22 (d, *J* = 7.6 Hz, 1H), 7.34 (t, *J* = 7.2 Hz, 1H), 7.40 (t, *J* = 7.6 Hz, 1H), 7.44 (d, *J* = 7.2 Hz, 1H), 7.49-7.55 (m, 2H), 7.69 (d, *J* = 7.6 Hz, 1H) ppm. <sup>13</sup>C NMR (100 MHz, CDCl<sub>3</sub>): δ = 118.8, 120.5, 124.6, 129.6, 129.8, 131.1, 132.8, 134.0, 134.9, 135.4, 142.7, 146.6, 191.0 ppm. HRMS (ESI<sup>+</sup>): calcd for C<sub>13</sub>H<sub>7</sub>ClNaO [M+Na]<sup>+</sup> 237.0083, found 237.0089.

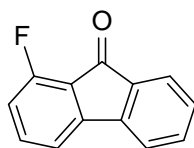

### 1-Fluoro-9H-fluoren-9-one (3e)

Following the general procedure, the reaction mixture was heated at 80 °C for 24 h. Purification via silica gel column chromatography (petroleum ether/EtOAc = 20/1, v/v) afforded the desired product as a yellow solid (64.2 mg, 81%). M.p.: 112-114 °C. <sup>1</sup>H NMR (400 MHz, CDCl<sub>3</sub>): δ = 6.95 (t, *J* = 8.4 Hz, 1H), 7.32-7.36 (m, 2H), 7.46-7.56 (m, 3H), 7.69 (d, *J* = 7.2 Hz, 1H) ppm. <sup>13</sup>C NMR (100 MHz, CDCl<sub>3</sub>): δ = 116.52, 116.55, 117.6, 117.8, 120.8, 124.7, 129.8, 134.1, 134.8, 137.1, 137.2, 143.5, 143.6, 146.51, 146.55, 158.2, 160.8, 190.3 ppm. HRMS (ESI<sup>+</sup>): calcd for C<sub>13</sub>H<sub>8</sub>FO [M+H]<sup>+</sup> 199.0559, found 199.0556.

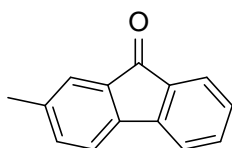

### 2-Methyl-9H-fluoren-9-one (3f)

Following the general procedure, the reaction mixture was heated at 80 °C for 24 h.

Purification via silica gel column chromatography (petroleum ether/EtOAc = 20/1, v/v) afforded the desired product as a yellow solid (58.2 mg, 75%). M.p.: 93-95 °C.  $^1\text{H}$  NMR (400 MHz,  $\text{CDCl}_3$ ):  $\delta$  = 2.38 (s, 3H), 7.24-7.26 (m, 1H), 7.28 (d,  $J$  = 8.0 Hz, 1H), 7.40 (d,  $J$  = 7.6 Hz, 1H), 7.44-7.47 (m, 3H), 7.63 (d,  $J$  = 7.2 Hz, 1H) ppm.  $^{13}\text{C}$  NMR (100 MHz,  $\text{CDCl}_3$ ):  $\delta$  = 21.5, 120.1, 120.3, 124.4, 125.2, 128.7, 134.4, 134.6, 134.8, 135.3, 139.4, 142.0, 144.8, 194.4 ppm. HRMS ( $\text{ESI}^+$ ): calcd for  $\text{C}_{14}\text{H}_{11}\text{O}$   $[\text{M}+\text{H}]^+$  195.0810, found 195.0808.

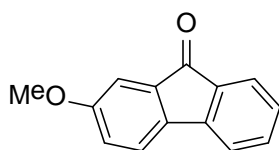

### 2-Methoxy-9H-fluoren-9-one (3g)

Following the general procedure, the reaction mixture was heated at 80 °C for 24 h. Purification via silica gel column chromatography (petroleum ether/EtOAc = 20/1, v/v) afforded the desired product as a yellow solid (61.3 mg, 73%). M.p.: 78-80 °C.  $^1\text{H}$  NMR (400 MHz,  $\text{CDCl}_3$ ):  $\delta$  = 3.92 (s, 3H), 7.04 (d,  $J$  = 8.0 Hz, 1H), 7.24-7.32 (m, 2H), 7.45-7.51 (m, 3H), 7.66 (d,  $J$  = 7.2 Hz, 1H) ppm.  $^{13}\text{C}$  NMR (100 MHz,  $\text{CDCl}_3$ ):  $\delta$  = 55.9, 109.5, 119.7, 120.4, 121.5, 124.5, 128.0, 134.5, 135.0, 136.1, 137.1, 145.0, 161.0, 194.0 ppm. HRMS ( $\text{ESI}^+$ ): calcd for  $\text{C}_{14}\text{H}_{10}\text{NaO}_2$   $[\text{M}+\text{Na}]^+$  233.0578, found 233.0581.

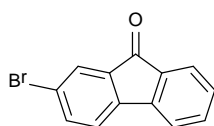

### 2-Bromo-9H-fluoren-9-one (3h)

Following the general procedure, the reaction mixture was heated at 80 °C for 24 h. Purification via silica gel column chromatography (petroleum ether/EtOAc = 20/1, v/v) afforded the desired product as a yellow solid (81.9 mg, 79%). M.p.: 138-140 °C.  $^1\text{H}$  NMR (400 MHz,  $\text{CDCl}_3$ ):  $\delta$  = 7.31-7.35 (m, 1H), 7.40 (d,  $J$  = 8.0 Hz, 1H), 7.50-7.51 (m, 2H), 7.61 (d,  $J$  = 7.6 Hz, 1H), 7.66 (d,  $J$  = 7.6 Hz, 1H), 7.77 (s, 1H) ppm.  $^{13}\text{C}$  NMR (100 MHz,  $\text{CDCl}_3$ ):  $\delta$  = 120.6, 121.9, 123.0, 124.7, 127.7, 129.6, 133.8, 135.2, 135.9, 137.2, 143.1, 143.8, 192.5 ppm. HRMS ( $\text{ESI}^+$ ): calcd for

$C_{13}H_7BrNaO$   $[M+Na]^+$  280.9578, found 280.9584.

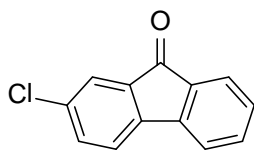

### 2-Chloro-9H-fluoren-9-one (3i)

Following the general procedure, the reaction mixture was heated at 80 °C for 24 h. Purification via silica gel column chromatography (petroleum ether/EtOAc = 20/1, v/v) afforded the desired product as a yellow solid (64.2 mg, 75%). M.p.: 122-124 °C.  $^1H$  NMR (400 MHz,  $CDCl_3$ ):  $\delta$  = 7.29-7.32 (m, 1H), 7.45 (s, 2H), 7.50 (d,  $J$  = 4.0 Hz, 2H), 7.62 (s, 1H), 7.66 (d,  $J$  = 7.6 Hz, 1H) ppm.  $^{13}C$  NMR (100 MHz,  $CDCl_3$ ):  $\delta$  = 120.6, 121.5, 124.8, 124.9, 129.5, 134.1, 134.3, 135.19, 135.24, 135.8, 142.7, 143.8, 192.6 ppm. HRMS ( $ESI^+$ ): calcd for  $C_{13}H_7ClNaO$   $[M+Na]^+$  237.0083, found 237.0087.

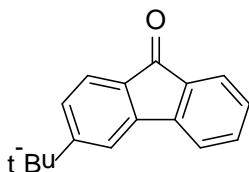

### 3-Tert-butyl-9H-fluoren-9-one (3j)

Following the general procedure, the reaction mixture was heated at 80 °C for 24 h. Purification via silica gel column chromatography (petroleum ether/EtOAc = 20/1, v/v) afforded the desired product as a yellow liquid (68.9 mg, 73%).  $^1H$  NMR (400 MHz,  $CDCl_3$ ):  $\delta$  = 1.38 (s, 9 H), 7.28 (t,  $J$  = 7.2 Hz, 1H), 7.32 (d,  $J$  = 8.0 Hz, 1H), 7.47 (t,  $J$  = 7.6 Hz, 1H), 7.54-7.55 (m, 2H), 7.59 (d,  $J$  = 8.0 Hz, 1H), 7.64 (d,  $J$  = 7.2 Hz, 1H) ppm.  $^{13}C$  NMR (100 MHz,  $CDCl_3$ ):  $\delta$  = 31.3, 35.7, 117.7, 120.2, 124.3, 126.2, 129.0, 132.0, 134.6, 134.9, 144.71, 144.72, 159.2, 193.9 ppm. HRMS ( $ESI^+$ ): calcd for  $C_{17}H_{17}O$   $[M+H]^+$  237.1279, found 237.1254.

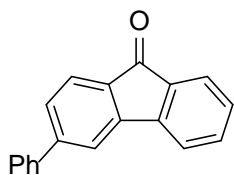

### 3-Phenyl-9H-fluoren-9-one (3k)



Following the general procedure, the reaction mixture was heated at 80 °C for 24 h. Purification via silica gel column chromatography (petroleum ether/EtOAc = 40/1, v/v) afforded the desired product as a yellow solid (59.4 mg, 58%). M.p.: 99-101 °C. <sup>1</sup>H NMR (400 MHz, CDCl<sub>3</sub>): δ = 7.32 (t, *J* = 7.2 Hz, 1H), 7.43 (t, *J* = 7.2 Hz, 1H), 7.48-7.53 (m, 4H), 7.58 (d, *J* = 7.2 Hz, 1H), 7.65-7.69 (m, 3H), 7.72-7.74 (m, 2H) ppm. <sup>13</sup>C NMR (100 MHz, CDCl<sub>3</sub>): δ = 119.4, 120.4, 124.4, 124.9, 127.3, 128.1, 128.6, 129.1, 129.4, 133.1, 134.8, 140.3, 144.2, 145.3, 148.0, 193.7 ppm. HRMS (ESI<sup>+</sup>): calcd for C<sub>19</sub>H<sub>13</sub>O [M+H]<sup>+</sup> 257.0966, found 257.0962.

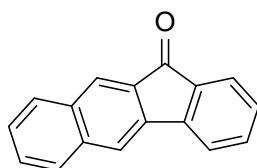

### 11H-Benzo[b]fluoren-11-one (3l)

Following the general procedure, the reaction mixture was heated at 80 °C for 24 h. Purification via silica gel column chromatography (petroleum ether/EtOAc = 20/1, v/v) afforded the desired product as a yellow solid (48.7mg, 53%). M.p.: 143-145 °C. <sup>1</sup>H NMR (400 MHz, CDCl<sub>3</sub>): δ = 7.35 (t, *J* = 7.2 Hz, 1H), 7.47 (t, *J* = 7.2 Hz, 1H), 7.53-7.58 (m, 2H), 7.71 (d, *J* = 7.6 Hz, 1H), 7.75 (d, *J* = 7.2 Hz, 1H), 7.82 (d, *J* = 8.4 Hz, 1H), 7.86 (s, 1H), 7.89 (d, *J* = 8.0 Hz, 1H), 8.17(s, 1H) ppm. <sup>13</sup>C NMR (100 MHz, CDCl<sub>3</sub>): δ = 119.2, 121.1, 124.6, 125.8, 127.1, 128.9, 129.1, 129.3, 131.0, 133.0, 133.8, 135.2, 136.3, 137.1, 138.5, 145.0, 193.3 ppm. HRMS (ESI<sup>+</sup>): calcd for C<sub>17</sub>H<sub>10</sub>NaO [M+Na]<sup>+</sup> 253.0629, found 253.0627.

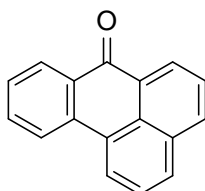

### 7H-Benzo[de]anthracen-7-one (3m)

Following the general procedure, the reaction mixture was heated at 80 °C for 24 h. Purification via silica gel column chromatography (petroleum ether/EtOAc = 20/1, v/v) afforded the desired product as a yellow solid (50.6 mg, 55%). M.p.: 165-167 °C. <sup>1</sup>H NMR (400 MHz, CDCl<sub>3</sub>): δ = 7.57 (t, *J* = 7.6 Hz, 1H), 7.71 (t, *J* = 8.0 Hz, 1H),

7.74-7.82 (m, 2H), 8.03 (d,  $J = 8.0$  Hz, 1H), 8.24 (d,  $J = 8.0$  Hz, 1H), 8.37 (d,  $J = 8.0$  Hz, 1H), 8.49 (d,  $J = 7.6$  Hz, 1H), 8.53 (d,  $J = 8.0$  Hz, 1H), 8.78 (d,  $J = 7.6$  Hz, 1H) ppm.  $^{13}\text{C}$  NMR (100 MHz,  $\text{CDCl}_3$ ):  $\delta = 123.2, 124.3, 126.7, 126.8, 127.1, 128.1, 128.3, 128.5, 128.7, 130.0, 130.4, 131.3, 133.2, 133.5, 135.3, 136.4, 184.1$  ppm. HRMS ( $\text{ESI}^+$ ): calcd for  $\text{C}_{17}\text{H}_{10}\text{NaO}$   $[\text{M}+\text{Na}]^+$  253.0629, found 253.0632.

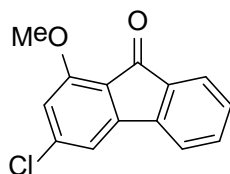

### 1-Methoxy-3-chloro -9H-fluoren-9-one (3n)

Following the general procedure, the reaction mixture was heated at 80 °C for 24 h. Purification via silica gel column chromatography (petroleum ether/EtOAc = 10/1, v/v) afforded the desired product as a yellow solid (51.9 mg, 55%). M.p.: 145-147 °C.  $^1\text{H}$  NMR (400 MHz,  $\text{CDCl}_3$ ):  $\delta = 3.98$  (s, 3H), 6.84 (s, 1H), 7.14 (s, 1H), 7.32-7.36 (m, 1H), 7.48 (d,  $J = 4.0$  Hz, 2H), 7.66 (d,  $J = 7.2$  Hz, 1H) ppm.  $^{13}\text{C}$  NMR (100 MHz,  $\text{CDCl}_3$ ):  $\delta = 56.4, 113.5, 113.9, 118.8, 120.5, 124.2, 130.0, 134.1, 134.8, 142.2, 142.7, 147.9, 158.6, 190.8$  ppm. HRMS ( $\text{ESI}^+$ ): calcd for  $\text{C}_{14}\text{H}_9\text{ClNaO}_2$   $[\text{M}+\text{Na}]^+$  267.0189, found 267.0186.

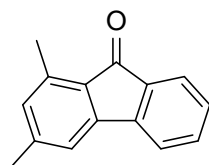

### 1,3-Dimethyl-9H-fluoren-9-one (3o)

Following the general procedure, the reaction mixture was heated at 80 °C for 24 h. Purification via silica gel column chromatography (petroleum ether/EtOAc = 20/1, v/v) afforded the desired product as a yellow solid (49.9 mg, 60%). M.p.: 108-110 °C.  $^1\text{H}$  NMR (400 MHz,  $\text{CDCl}_3$ ):  $\delta = 2.37$  (s, 3H), 2.58 (s, 3H), 6.84 (s, 1H), 7.16 (s, 1H), 7.27 (d,  $J = 8.0$  Hz, 1H), 7.42-7.47 (m, 2H), 7.60 (d,  $J = 6.8$  Hz, 1H) ppm.  $^{13}\text{C}$  NMR (100 MHz,  $\text{CDCl}_3$ ):  $\delta = 17.9, 22.1, 119.0, 119.9, 123.8, 128.8, 128.9, 132.4, 134.1, 135.0, 139.5, 143.8, 145.1, 145.3, 194.8$  ppm. HRMS ( $\text{ESI}^+$ ): calcd for  $\text{C}_{15}\text{H}_{13}\text{O}$   $[\text{M}+\text{H}]^+$  209.0966, found 209.0963.

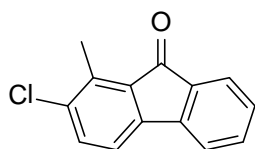

### 1-Methyl-2-chloro-9H-fluoren-9-one (3p)

Following the general procedure, the reaction mixture was heated at 80 °C for 24 h. Purification via silica gel column chromatography (petroleum ether/EtOAc = 20/1, v/v) afforded the desired product as a yellow solid (64.0 mg, 70%). M.p.: 140-142 °C.  $^1\text{H}$  NMR (400 MHz,  $\text{CDCl}_3$ ):  $\delta$  = 2.69 (s, 3H), 7.29 (d,  $J$  = 7.6 Hz, 2H), 7.43 (d,  $J$  = 7.6 Hz, 1H), 7.47-7.50 (m, 2H), 7.63 (d,  $J$  = 7.6 Hz, 1H) ppm.  $^{13}\text{C}$  NMR (100 MHz,  $\text{CDCl}_3$ ):  $\delta$  = 14.0, 118.7, 120.1, 124.3, 129.2, 132.3, 134.18, 134.21, 134.8, 136.5, 137.9, 143.0, 143.4, 194.1 ppm. HRMS ( $\text{ESI}^+$ ): calcd for  $\text{C}_{15}\text{H}_9\text{ClNaO}$   $[\text{M}+\text{Na}]^+$  251.0240, found 251.0219.

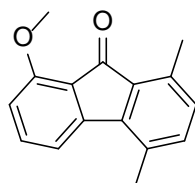

### 8-Methoxy-1,4-dimethyl-9H-fluoren-9-one (4a)

Following the general procedure, the reaction mixture was heated at 80 °C for 24 h. Purification via silica gel column chromatography (petroleum ether/EtOAc = 10/1, v/v) afforded the desired product **4a** as a yellow solid (68.5 mg, 72%). M.p.: 113-115 °C.  $^1\text{H}$  NMR (400 MHz,  $\text{CDCl}_3$ ):  $\delta$  = 2.54 (s, 3H), 2.59 (s, 3H), 3.98 (s, 3H), 6.84 (d,  $J$  = 8.8 Hz, 1H), 6.94 (d,  $J$  = 8.0 Hz, 1H), 7.09 (d,  $J$  = 8.0 Hz, 1H), 7.24 (d,  $J$  = 7.6 Hz, 1H), 7.43 (t,  $J$  = 8.0 Hz, 1H) ppm.  $^{13}\text{C}$  NMR (100 MHz,  $\text{CDCl}_3$ ):  $\delta$  = 17.7, 20.4, 56.0, 112.5, 116.2, 120.6, 131.1, 131.4, 132.0, 136.31, 136.32, 136.8, 141.3, 147.1, 158.3, 193.9 ppm. HRMS ( $\text{ESI}^+$ ): calcd for  $\text{C}_{16}\text{H}_{14}\text{NaO}_2$   $[\text{M}+\text{Na}]^+$  261.0891, found 261.0893.

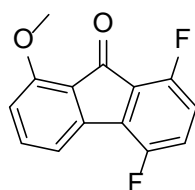

#### 1,4-Difluoro-8-methoxy-9H-fluoren-9-one (4b)

A flame-dried Schlenk test tube with a magnetic stirring bar was charged with **1b** (60.8 mg, 0.4 mmol), arene **2c** (4.0 equiv, 1.6 mmol), Pd(OAc)<sub>2</sub> (0.04 mmol, 10 mol%), Na<sub>2</sub>S<sub>2</sub>O<sub>8</sub> (3.0 equiv), Ac-Ile-OH (0.2 equiv), MeCN (2.0 equiv) and TfOH (2.0 mmol, 5.0 equiv) under an air atmosphere (the order is very important, arene **2c** should be added last). The resulting mixture was stirred for 5 min at room temperature, and then heated at 80 °C for the indicated time. The resulting solution was cooled to ambient temperature, diluted with 20 mL of CH<sub>2</sub>Cl<sub>2</sub>, filtered through a celite pad, and washed with 10-20 mL of CH<sub>2</sub>Cl<sub>2</sub>. The combined organic extracts were concentrated and the resulting residue was purified by column chromatography on silica gel (petroleum ether/ethyl acetate = 10/1, v/v) to provide the desired product **4b** as a yellow solid (64.2 mg, 65%). M.p.: 163-165 °C. <sup>1</sup>H NMR (400 MHz, CDCl<sub>3</sub>): δ = 3.99 (s, 3H), 6.85-6.92 (m, 1H), 7.05 (d, *J* = 6.8 Hz, 1H), 7.28-7.34 (m, 1H), 7.43-7.53 (m, 2H) ppm. <sup>13</sup>C NMR (100 MHz, CDCl<sub>3</sub>): δ = 56.1, 109.9, 110.1, 113.1, 113.56, 113.58, 113.7, 113.8, 114.0, 117.0, 117.1, 117.3, 117.5, 120.27, 120.29, 120.48, 120.52, 120.56, 120.60, 130.89, 130.92, 130.94, 130.97, 137.3, 137.4, 140.11, 140.14, 140.19, 140.22, 144.59, 144.61, 144.63, 150.0, 150.1, 152.5, 152.6, 153.0, 153.2, 155.6, 155.7, 158.5, 189.4 ppm. HRMS (ESI<sup>+</sup>): calcd for C<sub>14</sub>H<sub>9</sub>F<sub>2</sub>O<sub>2</sub> [M+H]<sup>+</sup> 247.0571, found 247.0575.

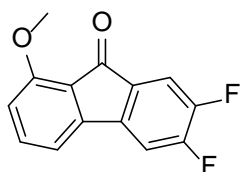

#### 6,7-Difluoro-1-methoxy-9H-fluoren-9-one (4c)

A flame-dried Schlenk test tube with a magnetic stirring bar was charged with **1b** (60.8 mg, 0.4 mmol), arene **2d** (4.0 equiv, 1.6 mmol), Pd(OAc)<sub>2</sub> (0.04 mmol, 10 mol%), Na<sub>2</sub>S<sub>2</sub>O<sub>8</sub> (3.0 equiv), Ac-Ile-OH (0.1 equiv), MeCN (2.0 equiv) and TfOH (2.0 mmol, 5.0 equiv) under an air atmosphere (the order is very important, arene should be added last). The resulting mixture was stirred for 5 min at room temperature, and then heated at 80 °C for the indicated time. The resulting solution was cooled to

ambient temperature, diluted with 20 mL of CH<sub>2</sub>Cl<sub>2</sub>, filtered through a celite pad, and washed with 10-20 mL of CH<sub>2</sub>Cl<sub>2</sub>. The combined organic extracts were concentrated and the resulting residue was purified by column chromatography on silica gel (petroleum ether/ethyl acetate = 10/1, v/v) to provide the desired product **4c** as a yellow solid (61.3 mg, 62%). M.p.: 163-165 °C. <sup>1</sup>H NMR (400 MHz, CDCl<sub>3</sub>): δ = 3.99 (s, 3H), 6.86 (d, *J* = 8.8 Hz, 1H), 7.05 (d, *J* = 7.2 Hz, 1H), 7.26-7.31 (m, 1H), 7.44 (d, *J* = 6.8 Hz, 1H), 7.48 (d, *J* = 7.6 Hz, 1H) ppm. <sup>13</sup>C NMR (100 MHz, CDCl<sub>3</sub>): δ = 56.1, 109.9, 110.1, 113.1, 113.53, 113.55, 113.6, 113.72, 113.74, 120.2, 120.3, 130.87, 130.91, 130.93, 130.96, 137.3, 140.10, 140.13, 140.17, 140.21, 144.6, 150.0, 150.1, 152.5, 152.6, 153.0, 153.2, 155.6, 155.7, 158.5, 189.3 ppm. HRMS (ESI<sup>+</sup>): calcd for C<sub>14</sub>H<sub>8</sub>F<sub>2</sub>NaO<sub>2</sub> [M+Na]<sup>+</sup> 269.0390, found 269.0392.

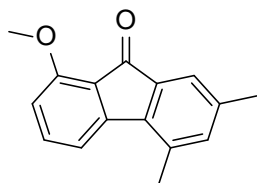

#### 8-Methoxy-1,3-dimethyl-9H-fluoren-9-one (**4d**)

Following the general procedure, the reaction mixture was heated at 80 °C for 24 h. Purification via silica gel column chromatography (petroleum ether/EtOAc = 10/1, v/v) afforded the desired product **4d** as a yellow solid (58.1 mg, 61%). M.p.: 148-150 °C. <sup>1</sup>H NMR (400 MHz, CDCl<sub>3</sub>): δ = 2.33 (s, 3H), 2.53 (s, 3H), 3.98 (s, 3H), 6.81 (d, *J* = 8.4 Hz, 1H), 7.04 (s, 1H), 7.20 (d, *J* = 7.6 Hz, 1H), 7.34 (s, 1H), 7.43 (t, *J* = 8.4 Hz, 1H) ppm. <sup>13</sup>C NMR (100 MHz, CDCl<sub>3</sub>): δ = 20.3, 21.2, 56.0, 112.3, 116.0, 120.5, 122.5, 133.3, 135.4, 136.8, 137.4, 138.3, 139.2, 147.9, 158.4, 192.7 ppm. HRMS (ESI<sup>+</sup>): calcd for C<sub>16</sub>H<sub>14</sub>NaO<sub>2</sub> [M+Na]<sup>+</sup> 261.0891, found 261.0890.

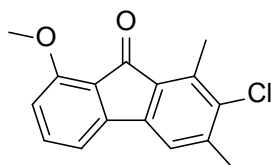

#### 2-Chloro-8-methoxy-1,3-dimethyl-9H-fluoren-9-one (**4e**)

A flame-dried Schlenk test tube with a magnetic stirring bar was charged with **1b** (60.8 mg, 0.4 mmol), arene **2f** (4.0 equiv, 1.6 mmol), Pd(OAc)<sub>2</sub> (0.04 mmol, 10

mol%), Na<sub>2</sub>S<sub>2</sub>O<sub>8</sub> (3.0 equiv), Ac-Ile-OH (0.2 equiv), MeCN (2.0 equiv) and TfOH (2.0 mmol, 5.0 equiv) under an air atmosphere (the order is very important, arene should be added last). The resulting mixture was stirred for 5 min at room temperature, and then heated at 80 °C for the indicated time. The resulting solution was cooled to ambient temperature, diluted with 20 mL of CH<sub>2</sub>Cl<sub>2</sub>, filtered through a celite pad, and washed with 10-20 mL of CH<sub>2</sub>Cl<sub>2</sub>. The combined organic extracts were concentrated and the resulting residue was purified by column chromatography on silica gel (petroleum ether/ethyl acetate = 10/1, v/v) to provide the desired product **4e** as a yellow solid (76.2 mg, 70%). M.p.: 118-120 °C. <sup>1</sup>H NMR (400 MHz, CDCl<sub>3</sub>): δ = 2.42 (s, 3H), 2.68 (s, 3H), 3.97 (s, 3H), 6.81 (d, *J* = 8.4 Hz, 1H), 7.06 (d, *J* = 7.2 Hz, 1H), 7.22 (s, 1H), 7.42 (t, *J* = 8.0 Hz, 1H) ppm. <sup>13</sup>C NMR (100 MHz, CDCl<sub>3</sub>): δ = 14.1, 22.0, 56.0, 112.6, 113.0, 120.3, 120.6, 130.3, 136.6, 136.7, 137.8, 141.7, 141.8, 145.2, 158.3, 192.3 ppm. HRMS (ESI<sup>+</sup>): calcd for C<sub>16</sub>H<sub>14</sub>ClO<sub>2</sub> [M+H]<sup>+</sup> 273.0682, found 273.0678.

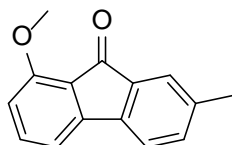

#### 1-Methoxy-7-methyl-9H-fluoren-9-one (**4f**)

Following the general procedure, the reaction mixture was heated at 80 °C for 24 h. Purification via silica gel column chromatography (petroleum ether/EtOAc = 10/1, v/v) afforded the desired product **4f** as a yellow solid (50.2 mg, 56%). M.p.: 128-130 °C. <sup>1</sup>H NMR (400 MHz, CDCl<sub>3</sub>): δ = 2.37 (s, 3H), 3.98 (s, 3H), 6.80 (d, *J* = 8.4 Hz, 1H), 7.09 (d, *J* = 7.2 Hz, 1H), 7.25 (d, *J* = 8.8 Hz, 1H), 7.37 (d, *J* = 7.2 Hz, 1H), 7.43 (t, *J* = 8.0 Hz, 1H), 7.47 (s, 1H) ppm. <sup>13</sup>C NMR (100 MHz, CDCl<sub>3</sub>): δ = 21.5, 56.1, 112.7, 112.8, 120.2, 120.3, 124.8, 134.5, 134.9, 136.9, 139.6, 140.7, 146.9, 158.4, 192.4 ppm. HRMS (ESI<sup>+</sup>): calcd for C<sub>15</sub>H<sub>12</sub>NaO<sub>2</sub> [M+Na]<sup>+</sup> 247.0735, found 247.0742.

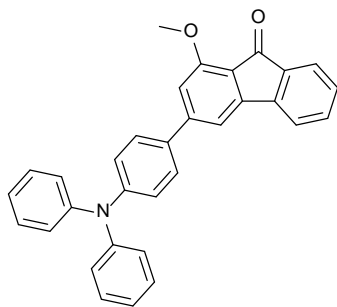

### 3-(4-(Diphenylamino)phenyl)-1-methoxy-9H-fluoren-9-one (**6**)

A flame-dried Schlenk test tube with a magnetic stirring bar was charged with **3n** (73.4 mg, 0.3 mmol), 4-(diphenylamino)phenylboronic acid (171.6 mg, 0.6 mmol), Pd(OAc)<sub>2</sub> (10 mol%), XPhos (20 mol%), K<sub>3</sub>PO<sub>4</sub> (3.0 equiv) and THF (4 ml) under an N<sub>2</sub> atmosphere. The reaction mixture was stirred at 100 °C for 24 h. The reaction mixture was then cooled to ambient temperature, diluted with 10-20 mL of EtOAc, filtered through a celite pad, and washed with 10-20 mL of EtOAc. Organic solvent was removed under reduced pressure. The residue was purified by flash column chromatography (petroleum ether/EtOAc = 5/1, v/v) to afford the desired product **6** as a yellow solid (70.7 mg, 52%). M.p.: 78-80 °C. <sup>1</sup>H NMR (400 MHz, CDCl<sub>3</sub>): δ = 4.05 (s, 3H), 6.96 (s, 1H), 7.08 (t, *J* = 7.2 Hz, 2H), 7.16 (d, *J* = 8.0 Hz, 5H), 7.28-7.34 (m, 6H), 7.45-7.56 (m, 5H), 7.67 (d, *J* = 7.2 Hz, 1H) ppm. <sup>13</sup>C NMR (100 MHz, CDCl<sub>3</sub>): δ = 56.1, 111.0, 111.8, 120.2, 123.2, 123.7, 124.0, 124.5, 125.0, 128.1, 129.4, 129.6, 133.5, 133.9, 135.3, 143.1, 147.2, 147.4, 148.7, 149.9, 158.7, 191.6 ppm. HRMS (ESI<sup>+</sup>): calcd for C<sub>32</sub>H<sub>23</sub>NNaO<sub>2</sub> [M+Na]<sup>+</sup> 476.1626, found 476.1632.

## VII. References

- [1] N.P. Ramirez, I. Bosque, J. C. Gonzalez-Gomez, *Org. Lett.*, 2015, **17**, 4550.
- [2] L. Ackermann, A.V. Lygin, N. Hofmann, *Angew. Chem. Int. Ed.*, 2011, **50**, 6379.

# VIII. Copies of $^1\text{H}$ and $^{13}\text{C}$ NMR spectra.

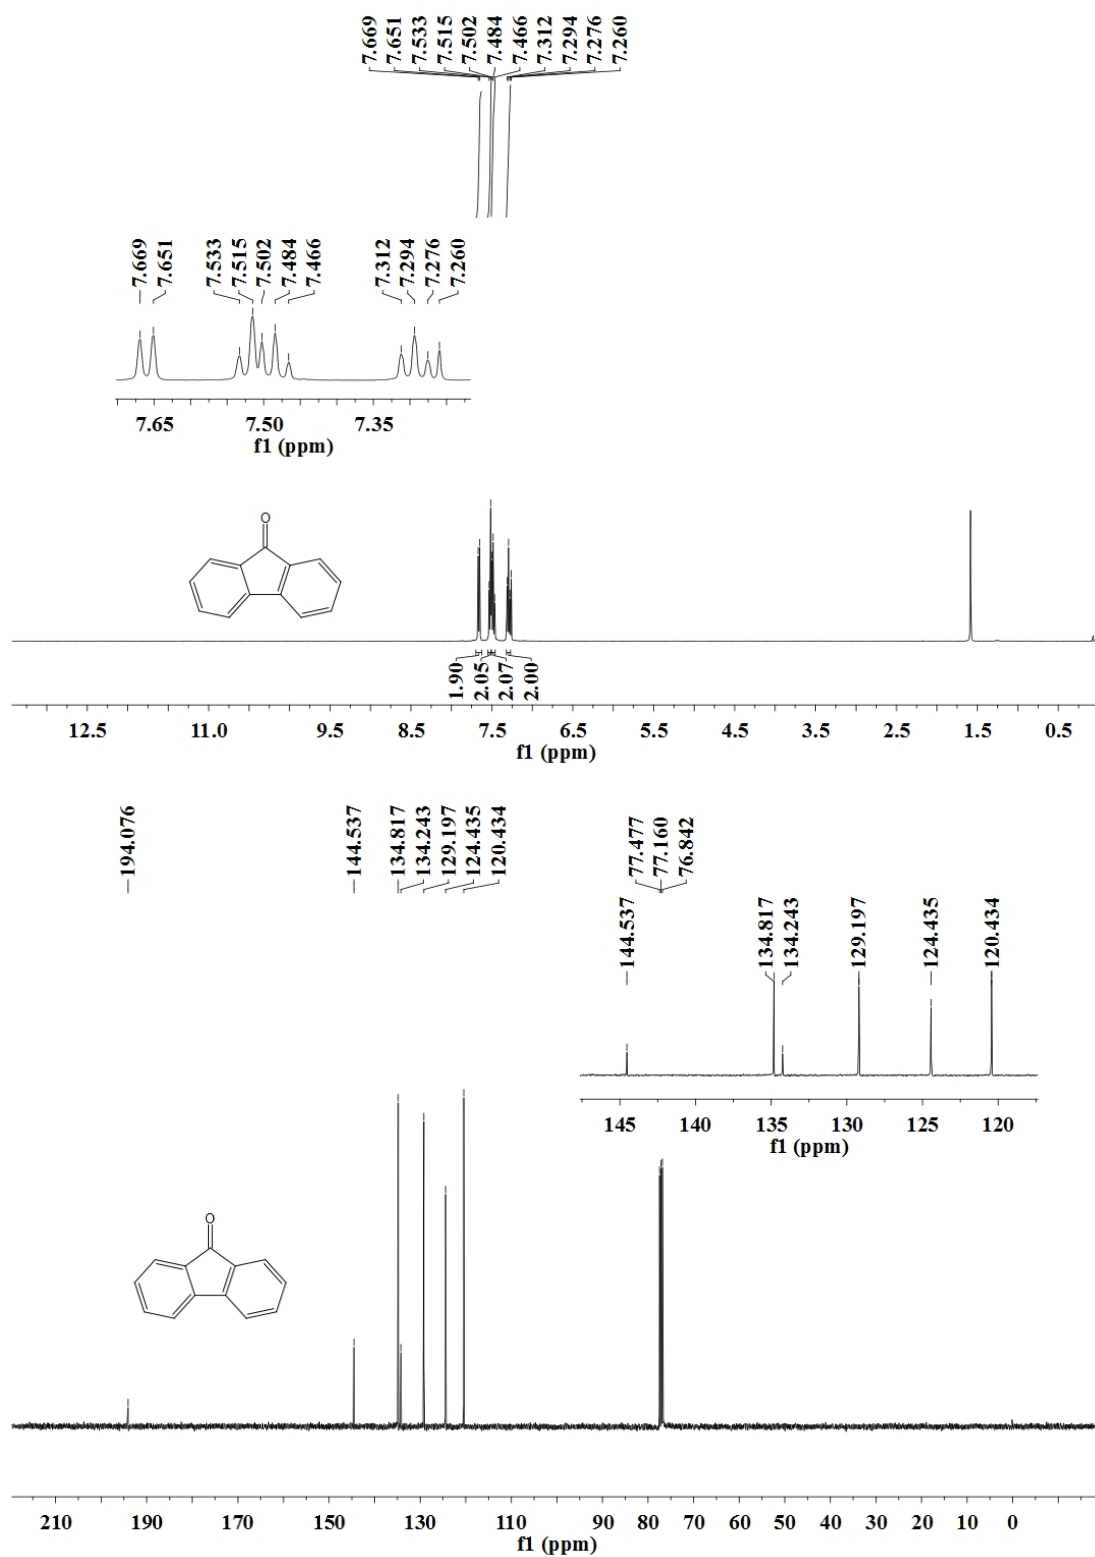



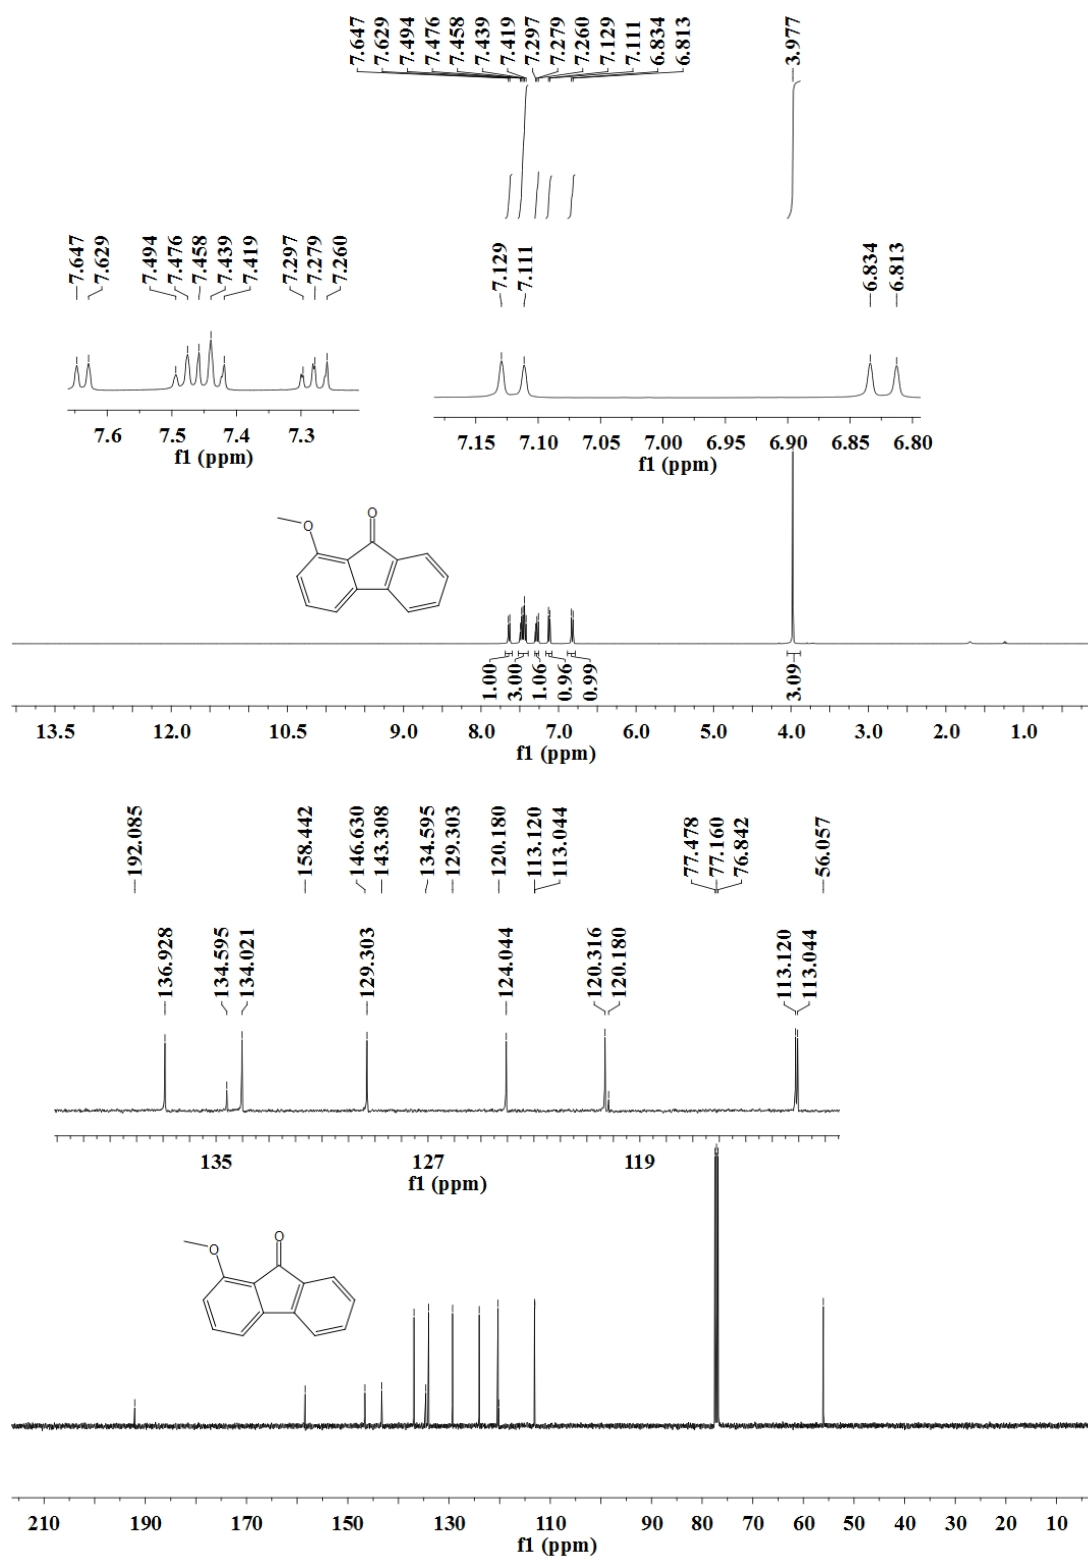

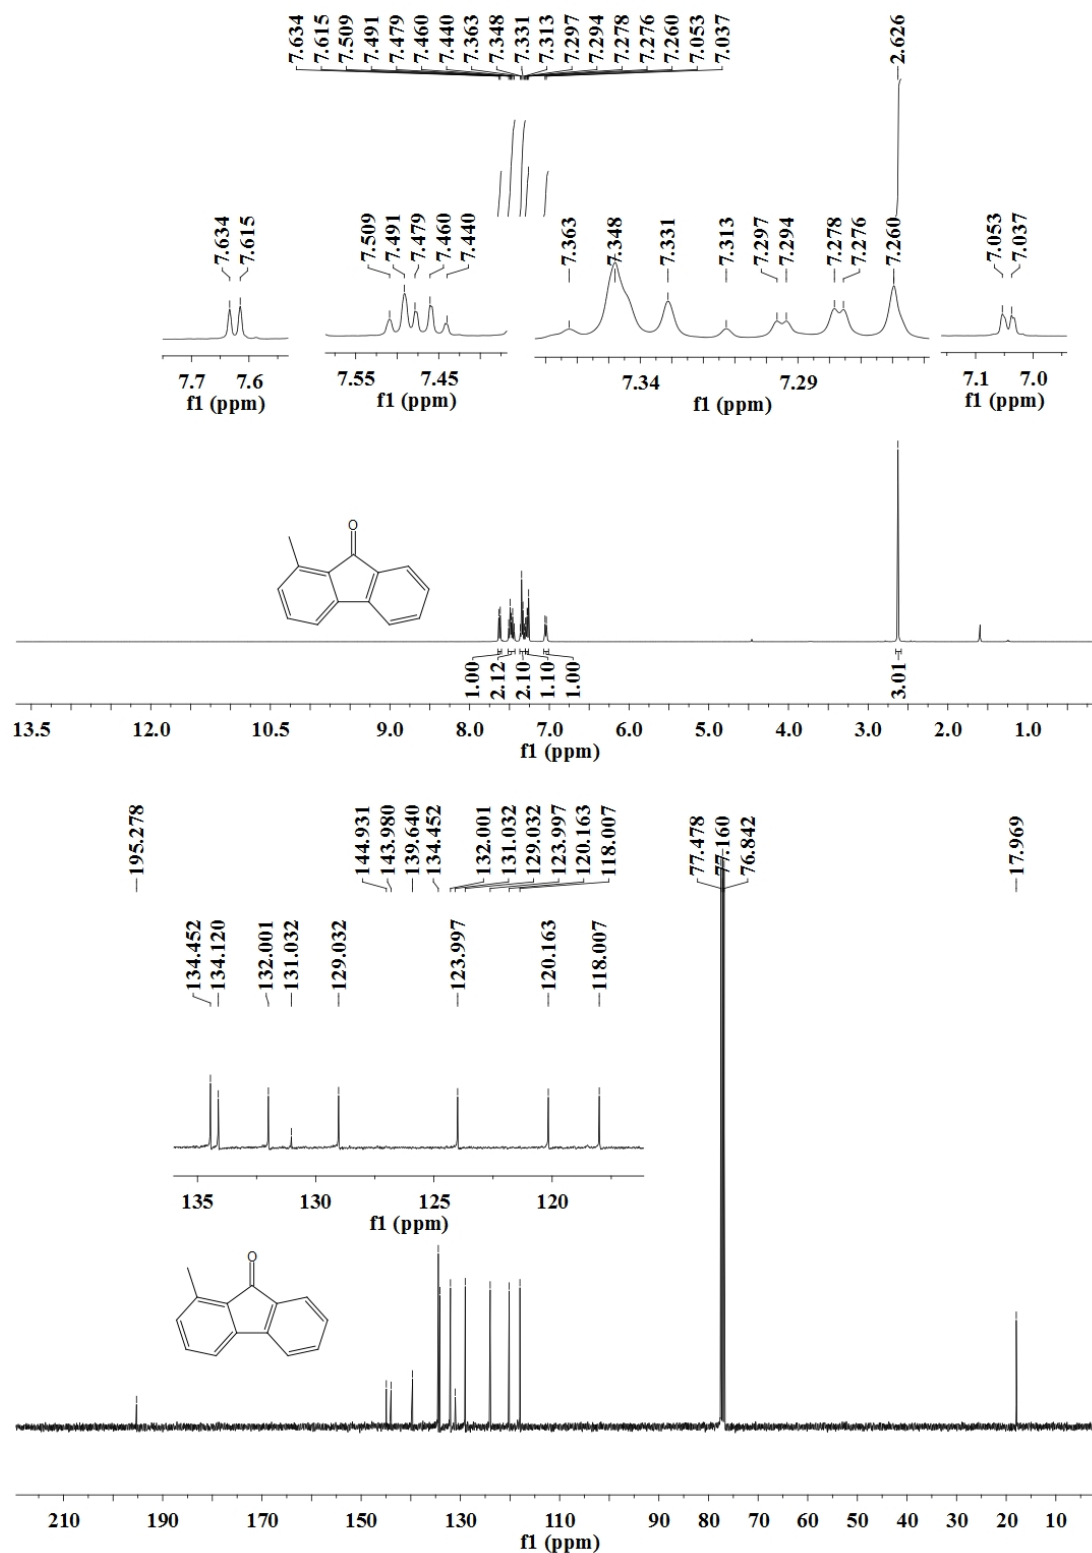

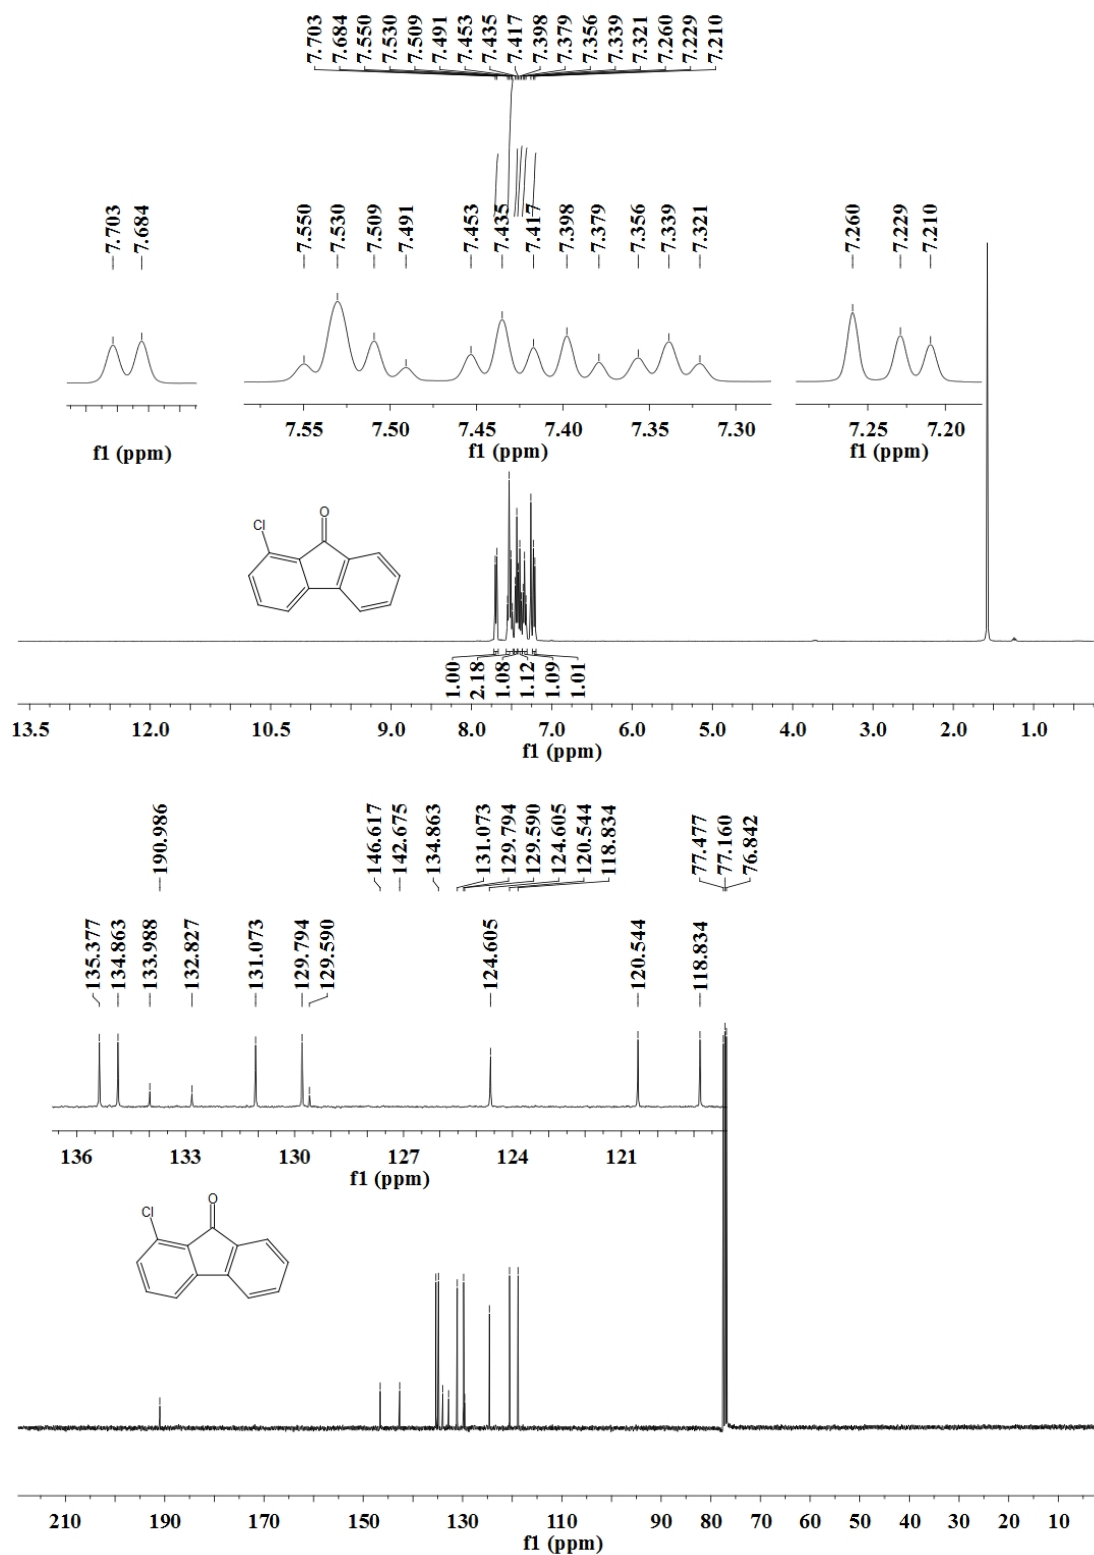

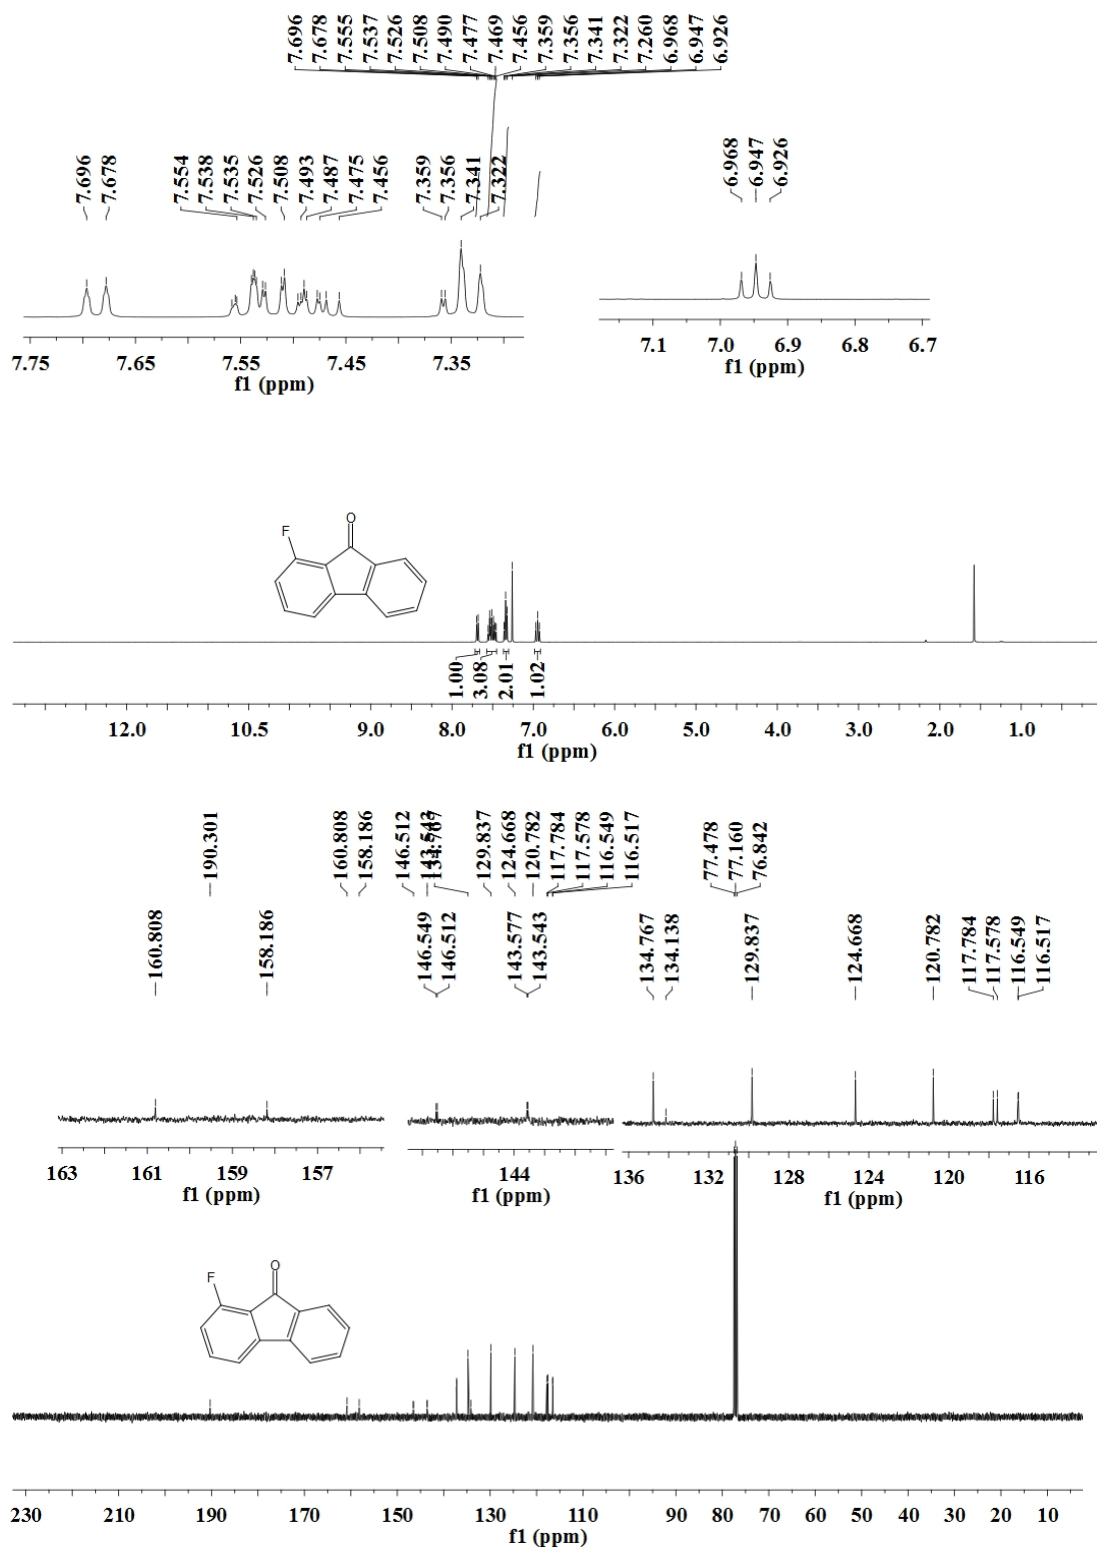

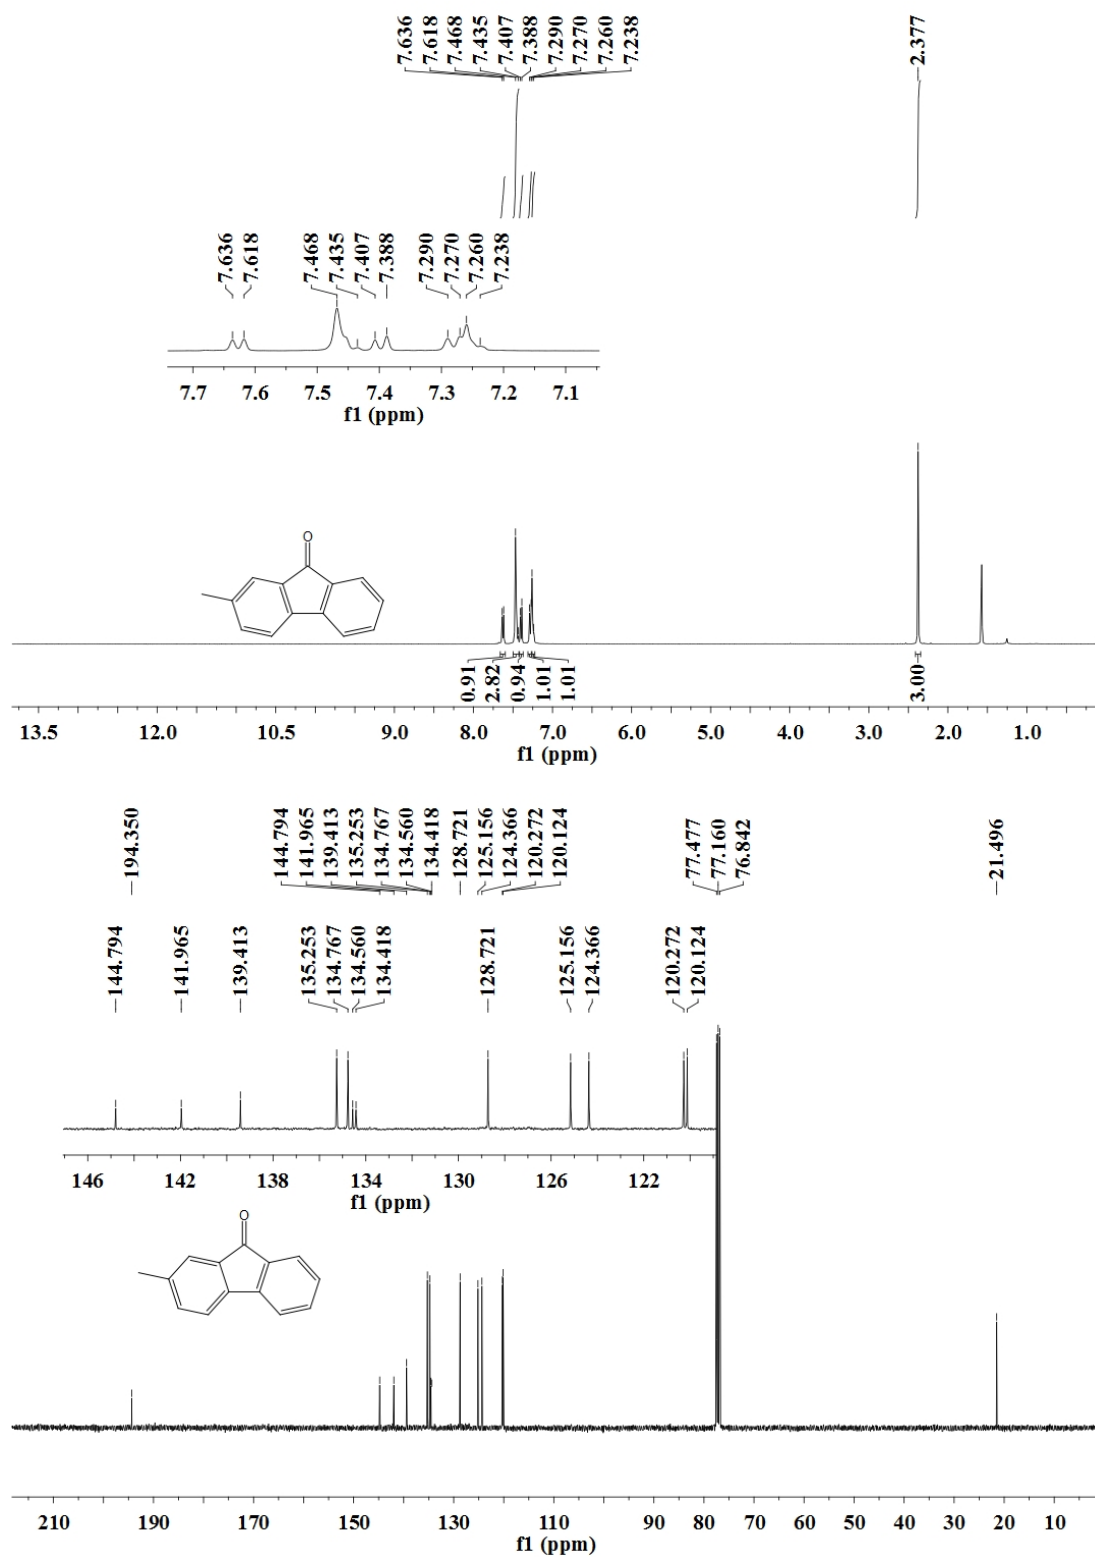

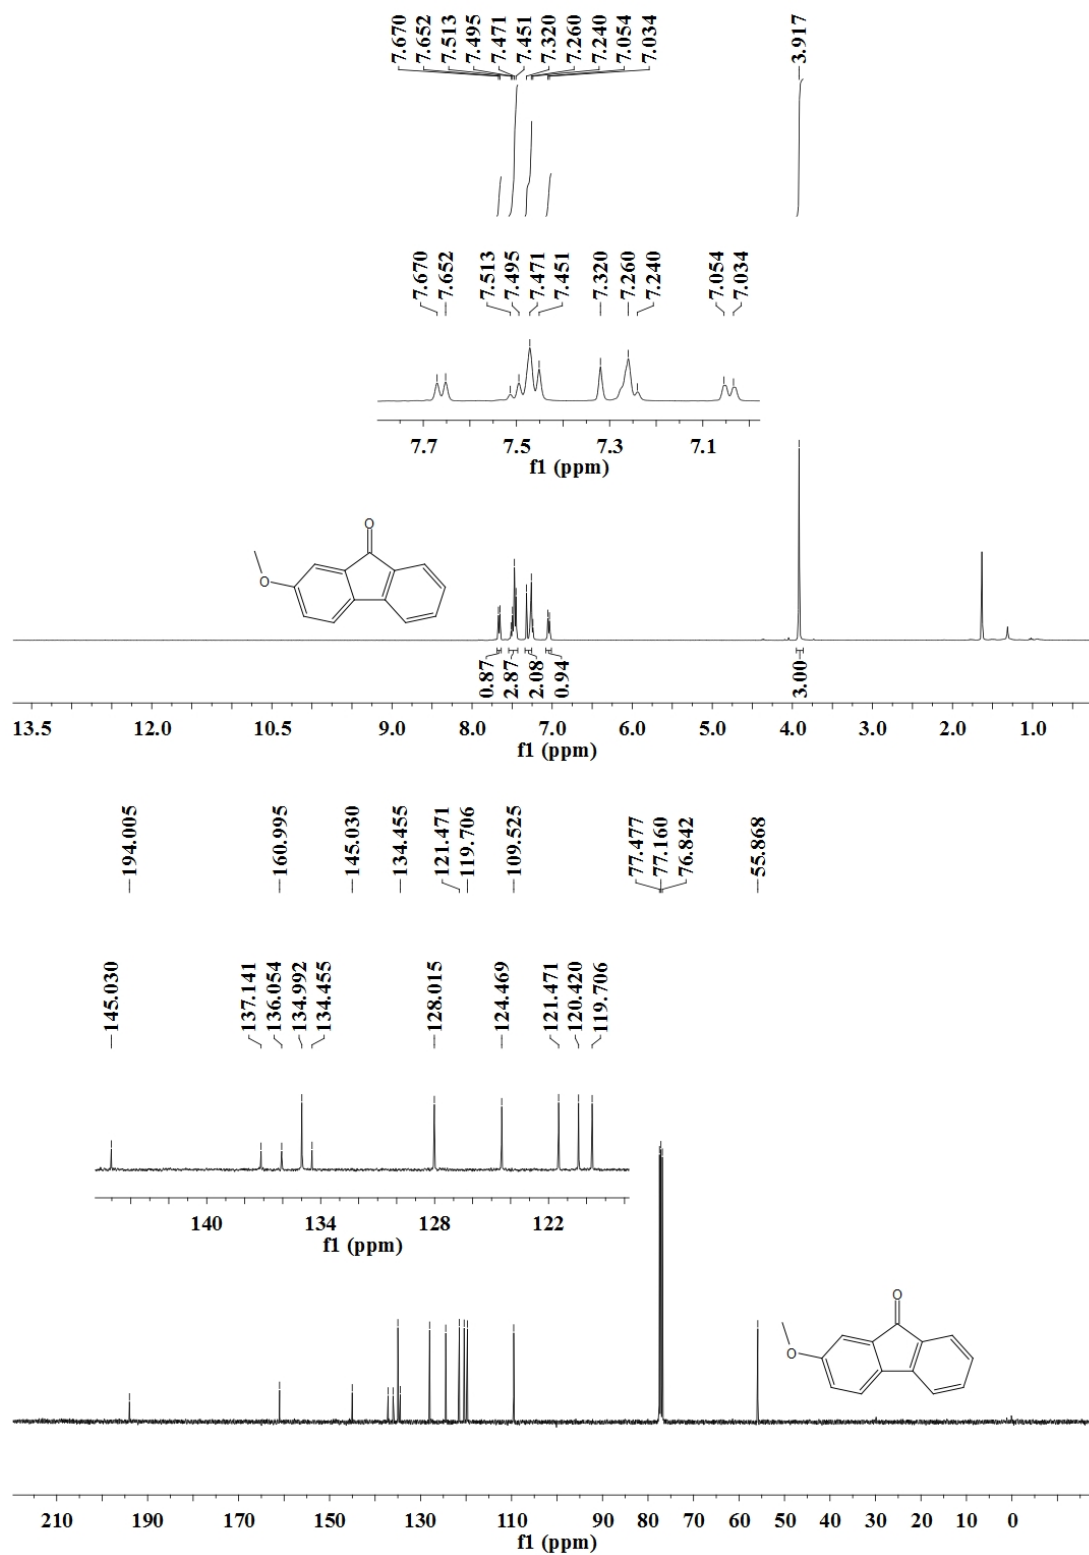

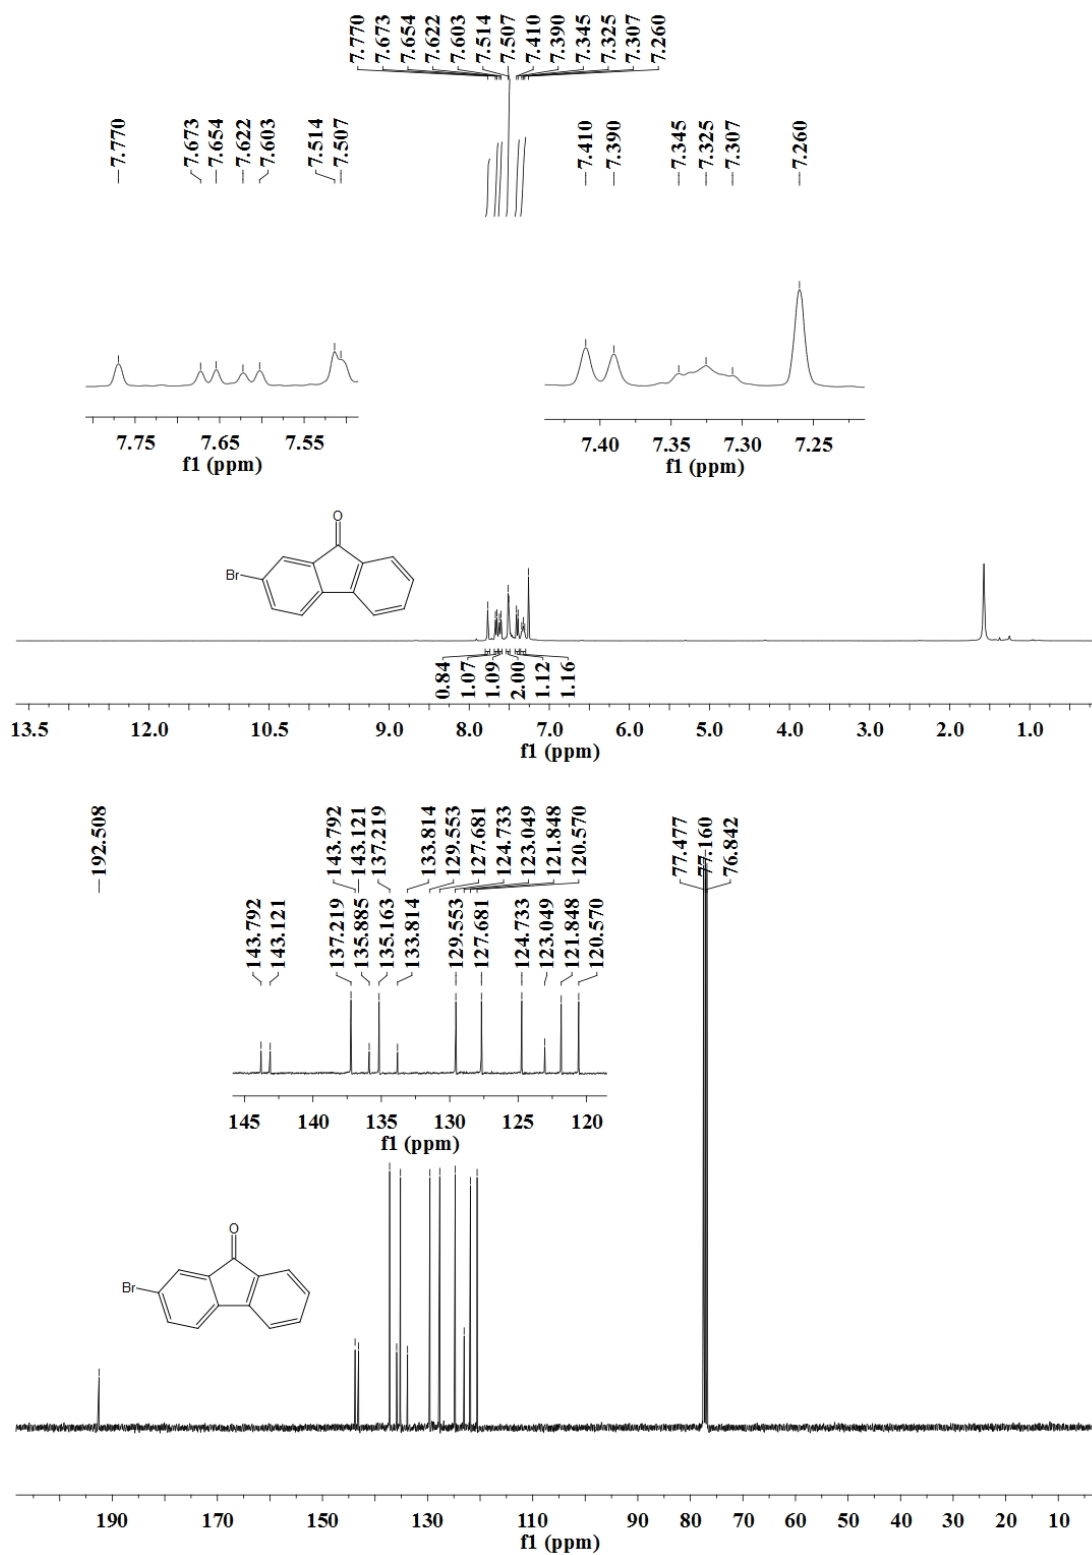

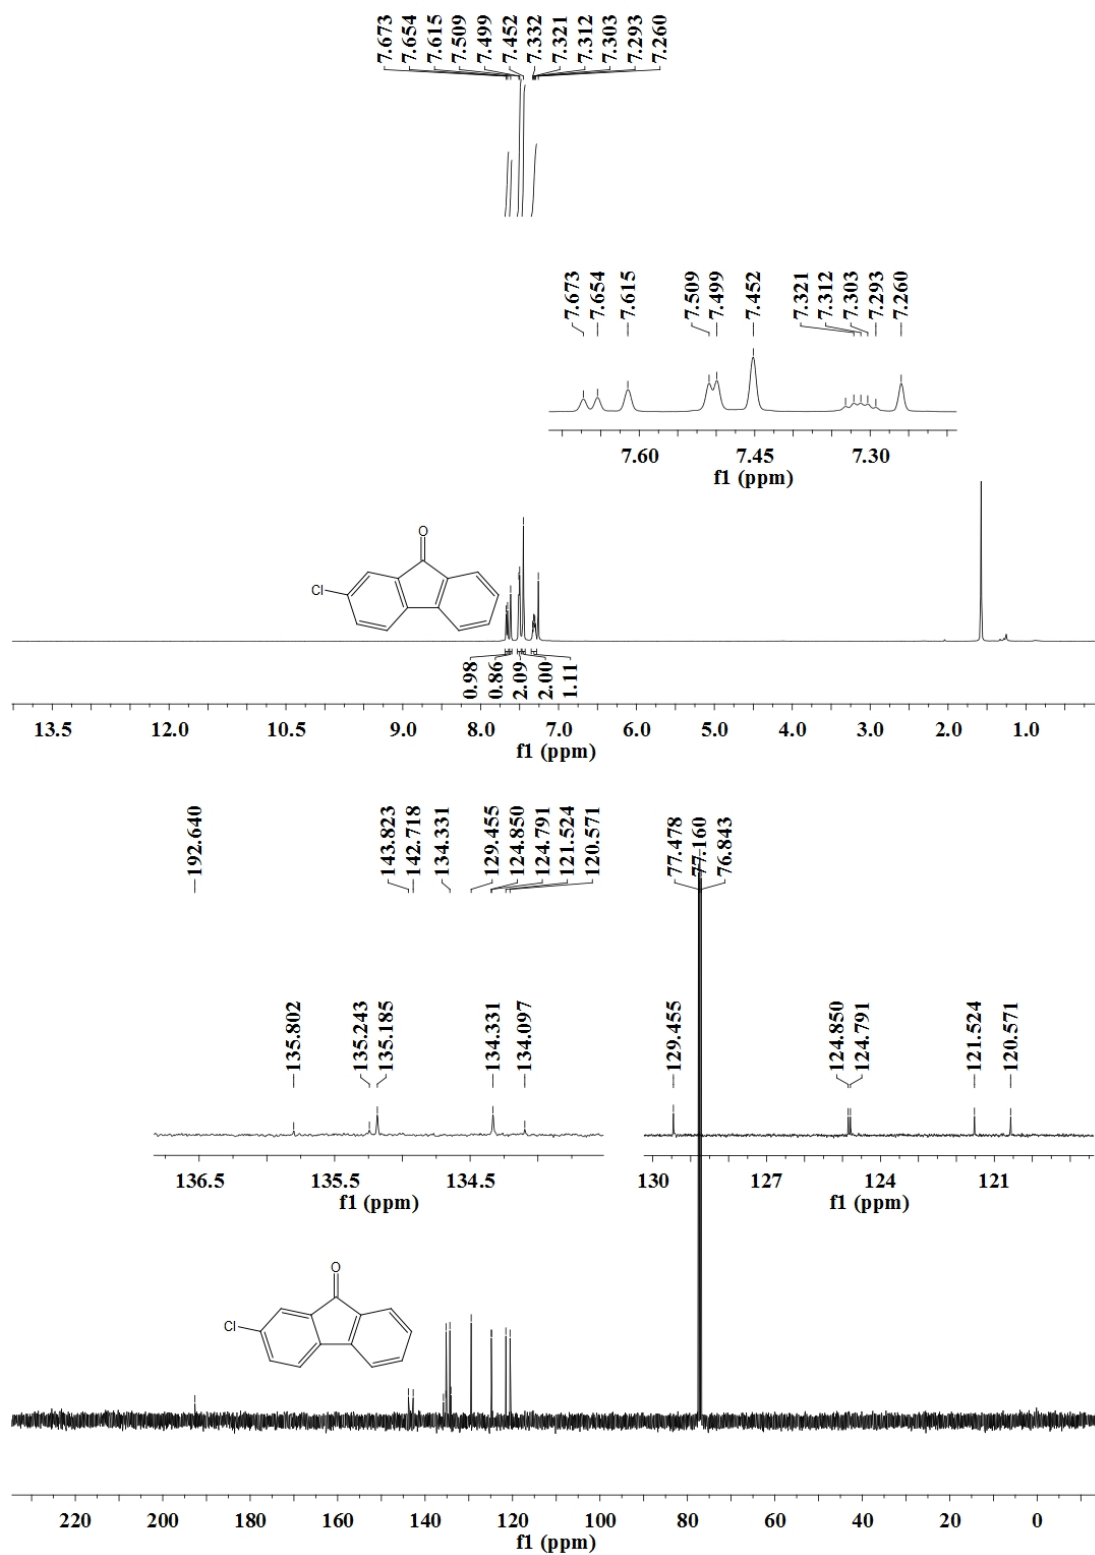



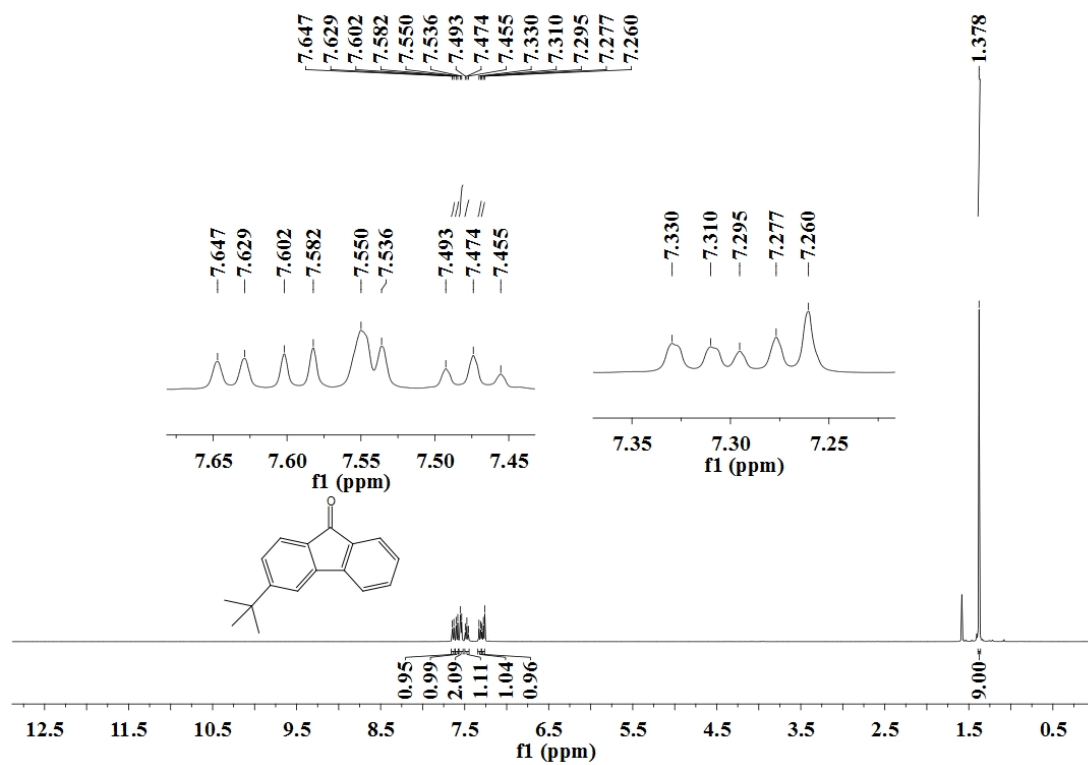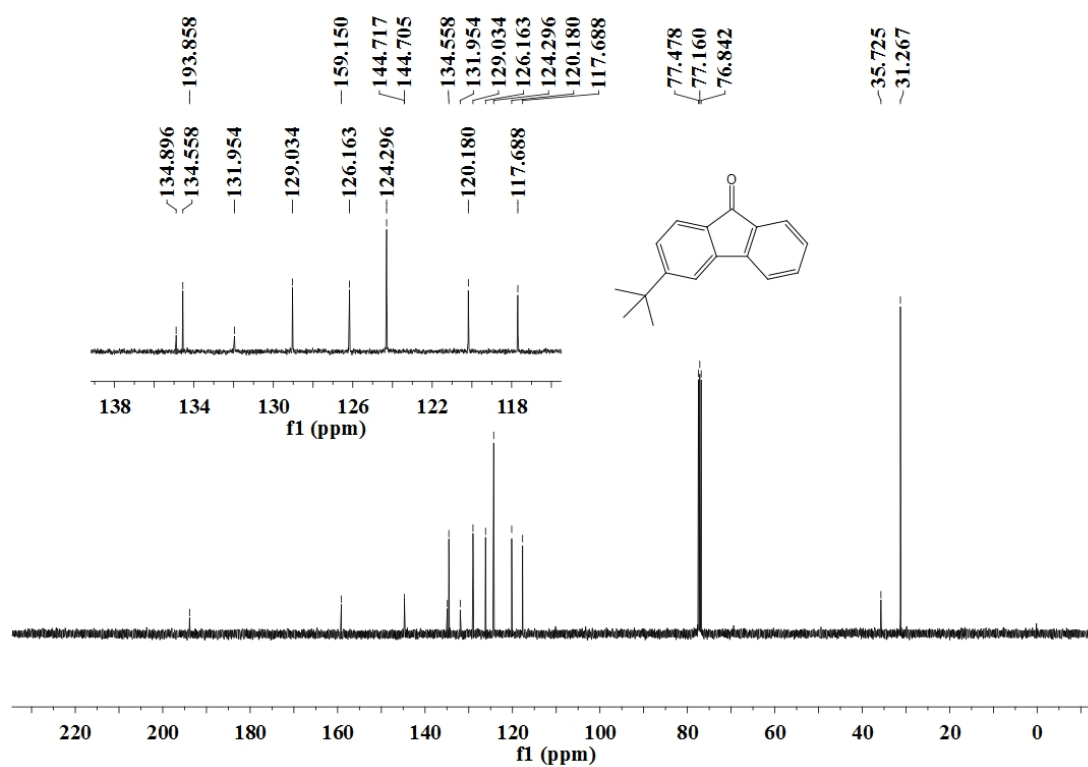

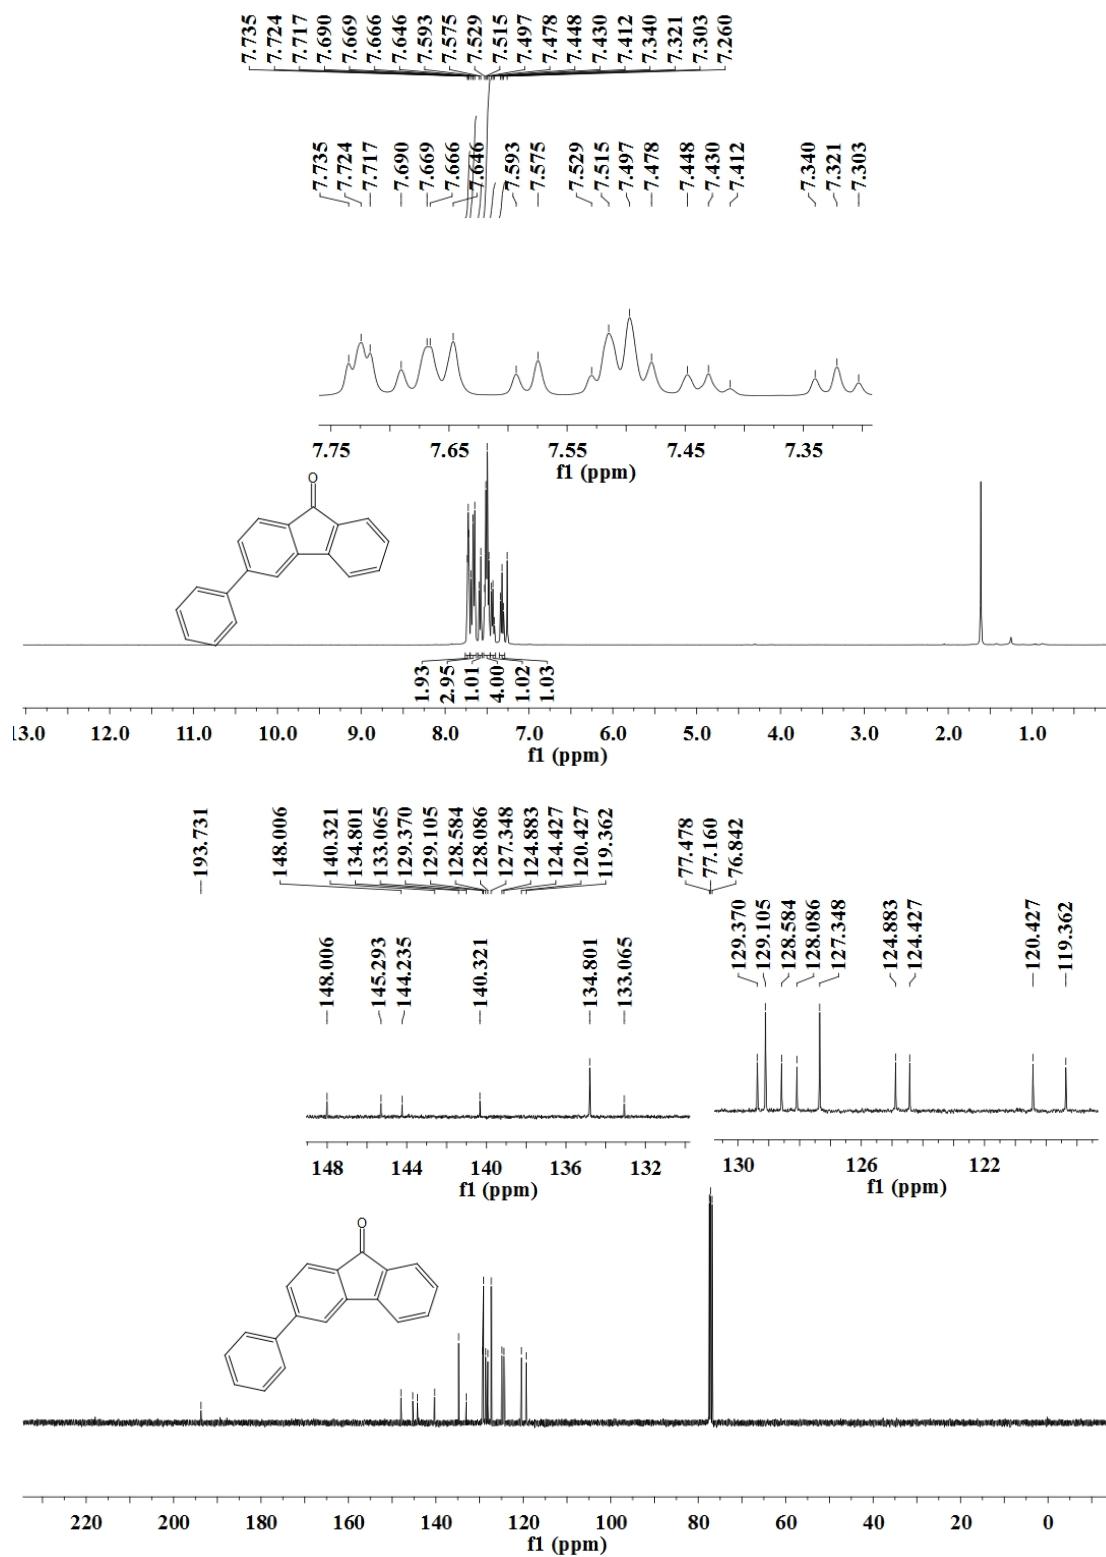

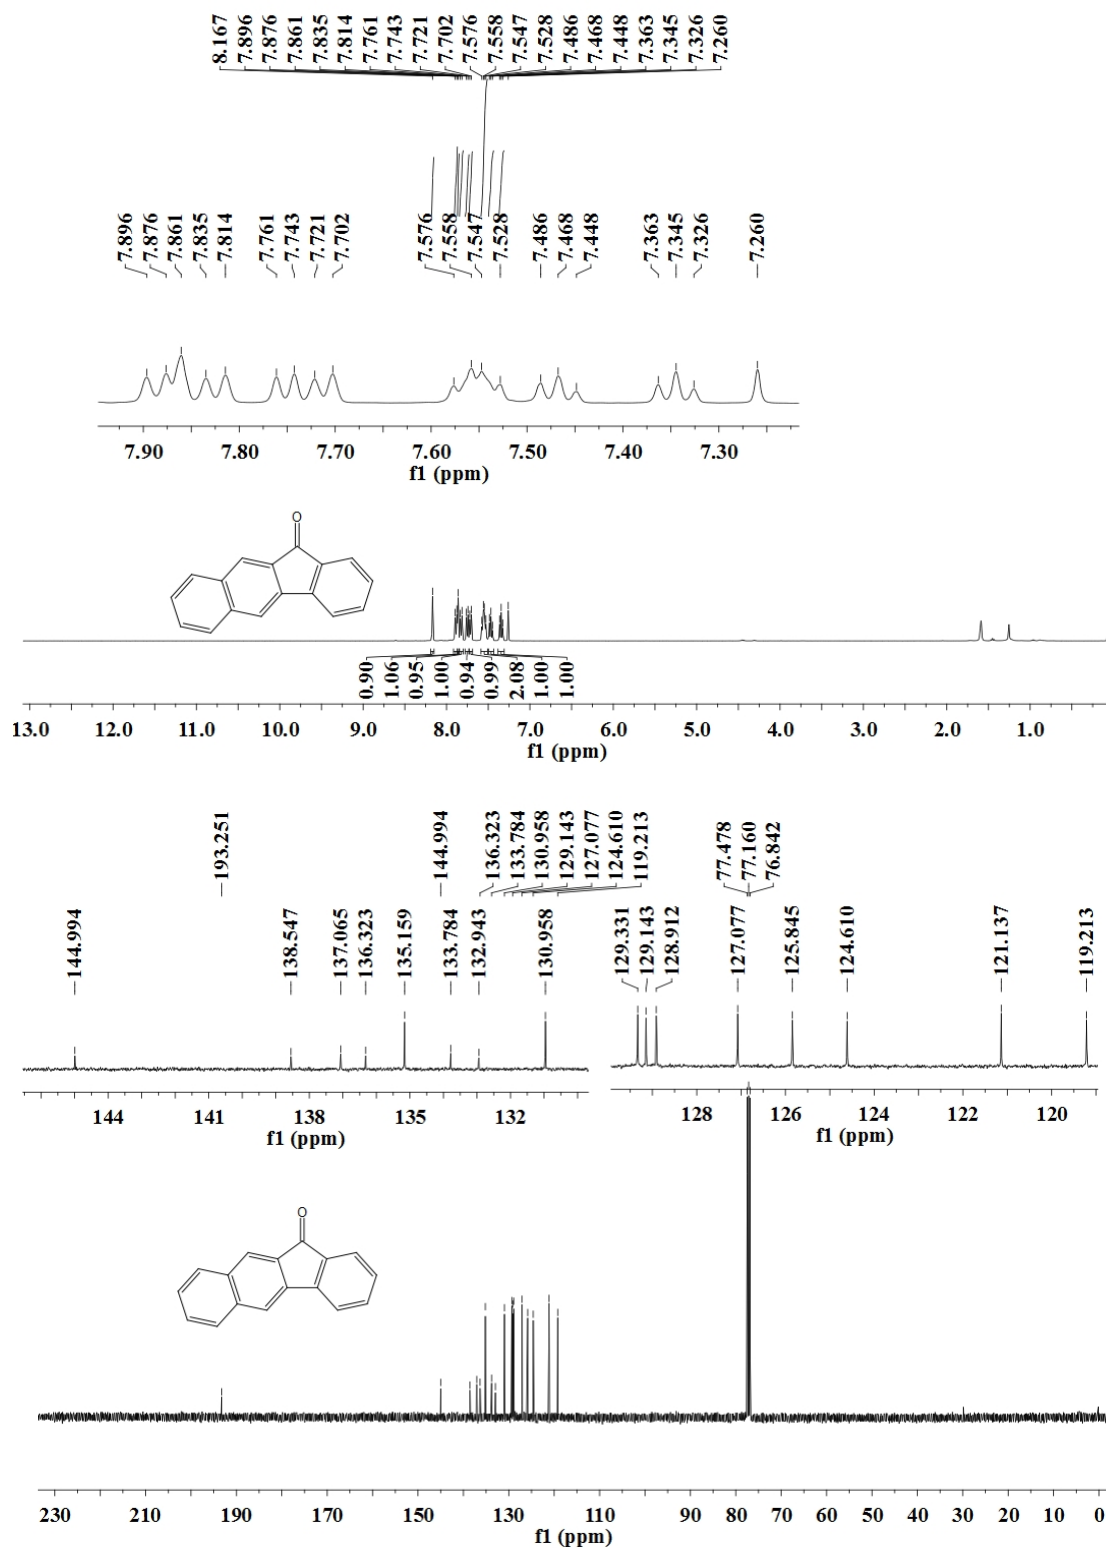

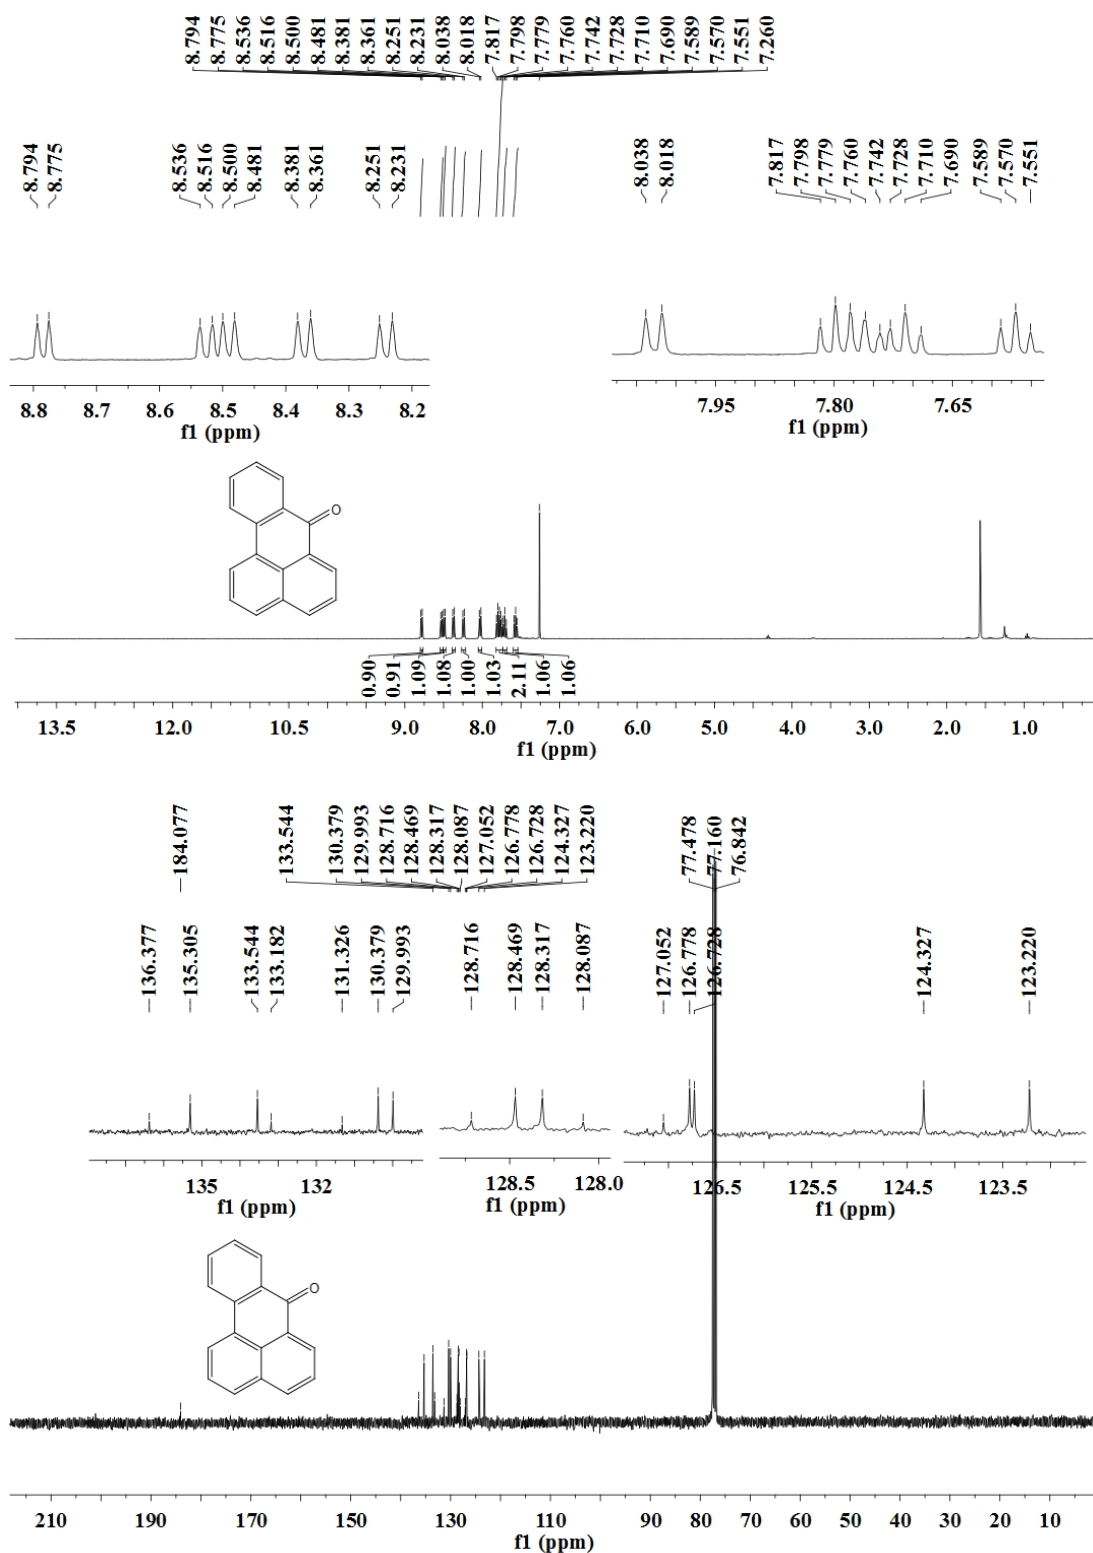

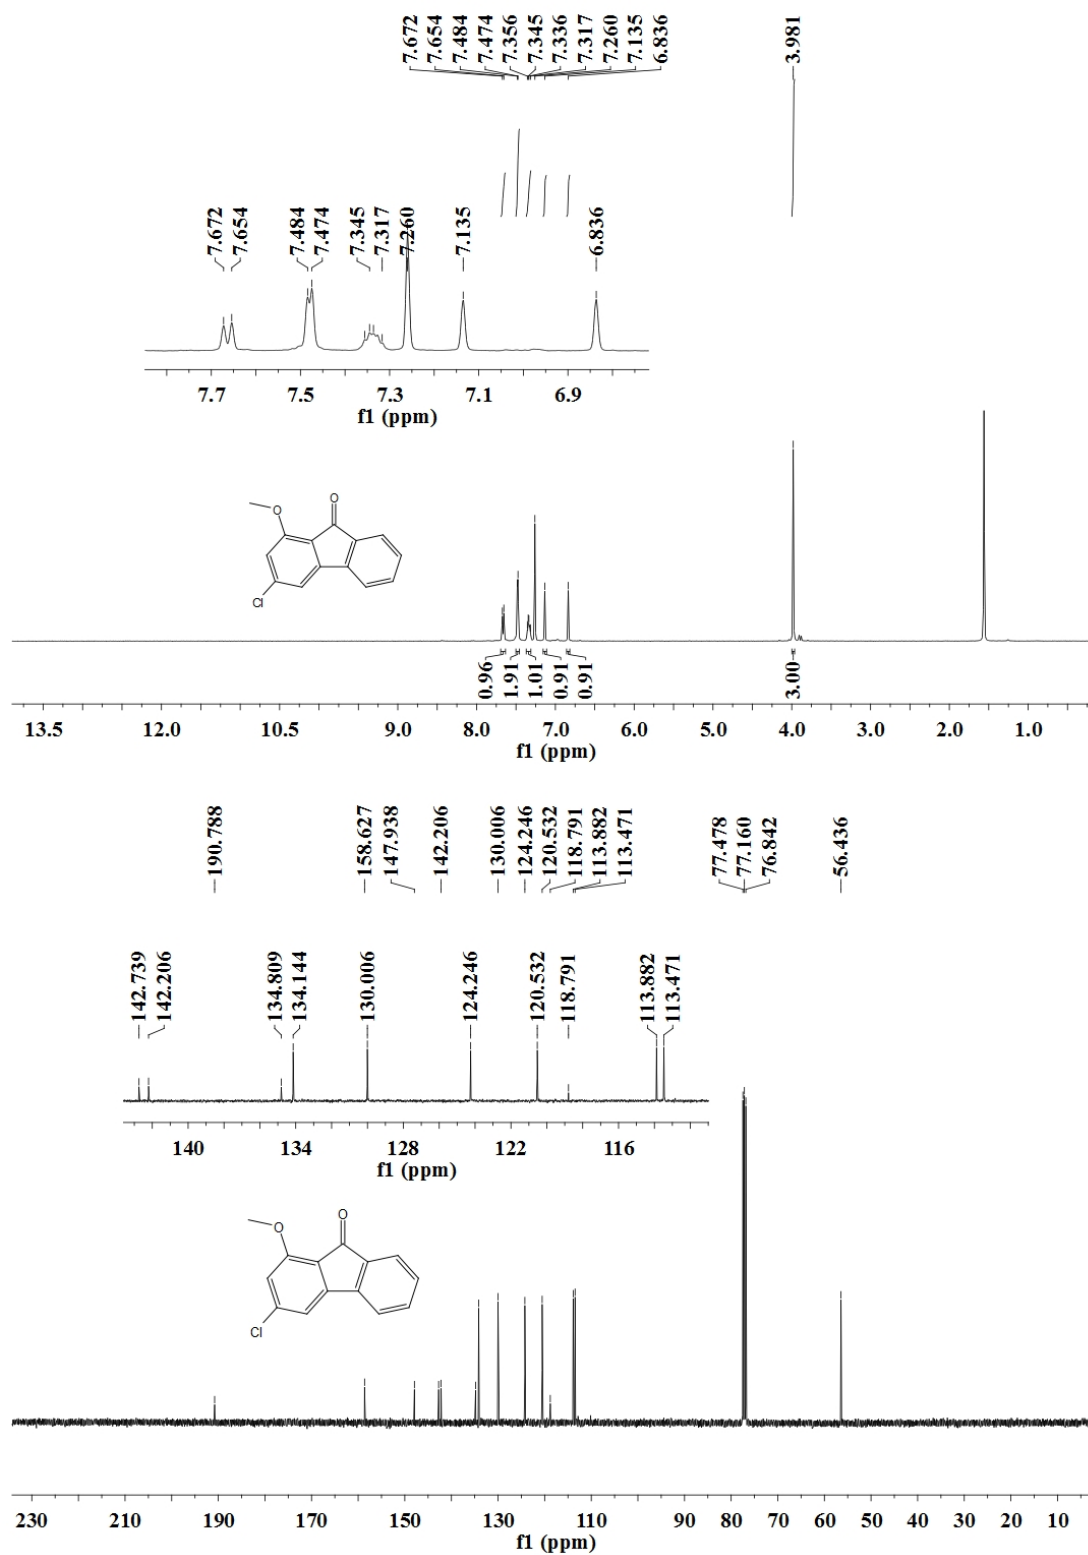

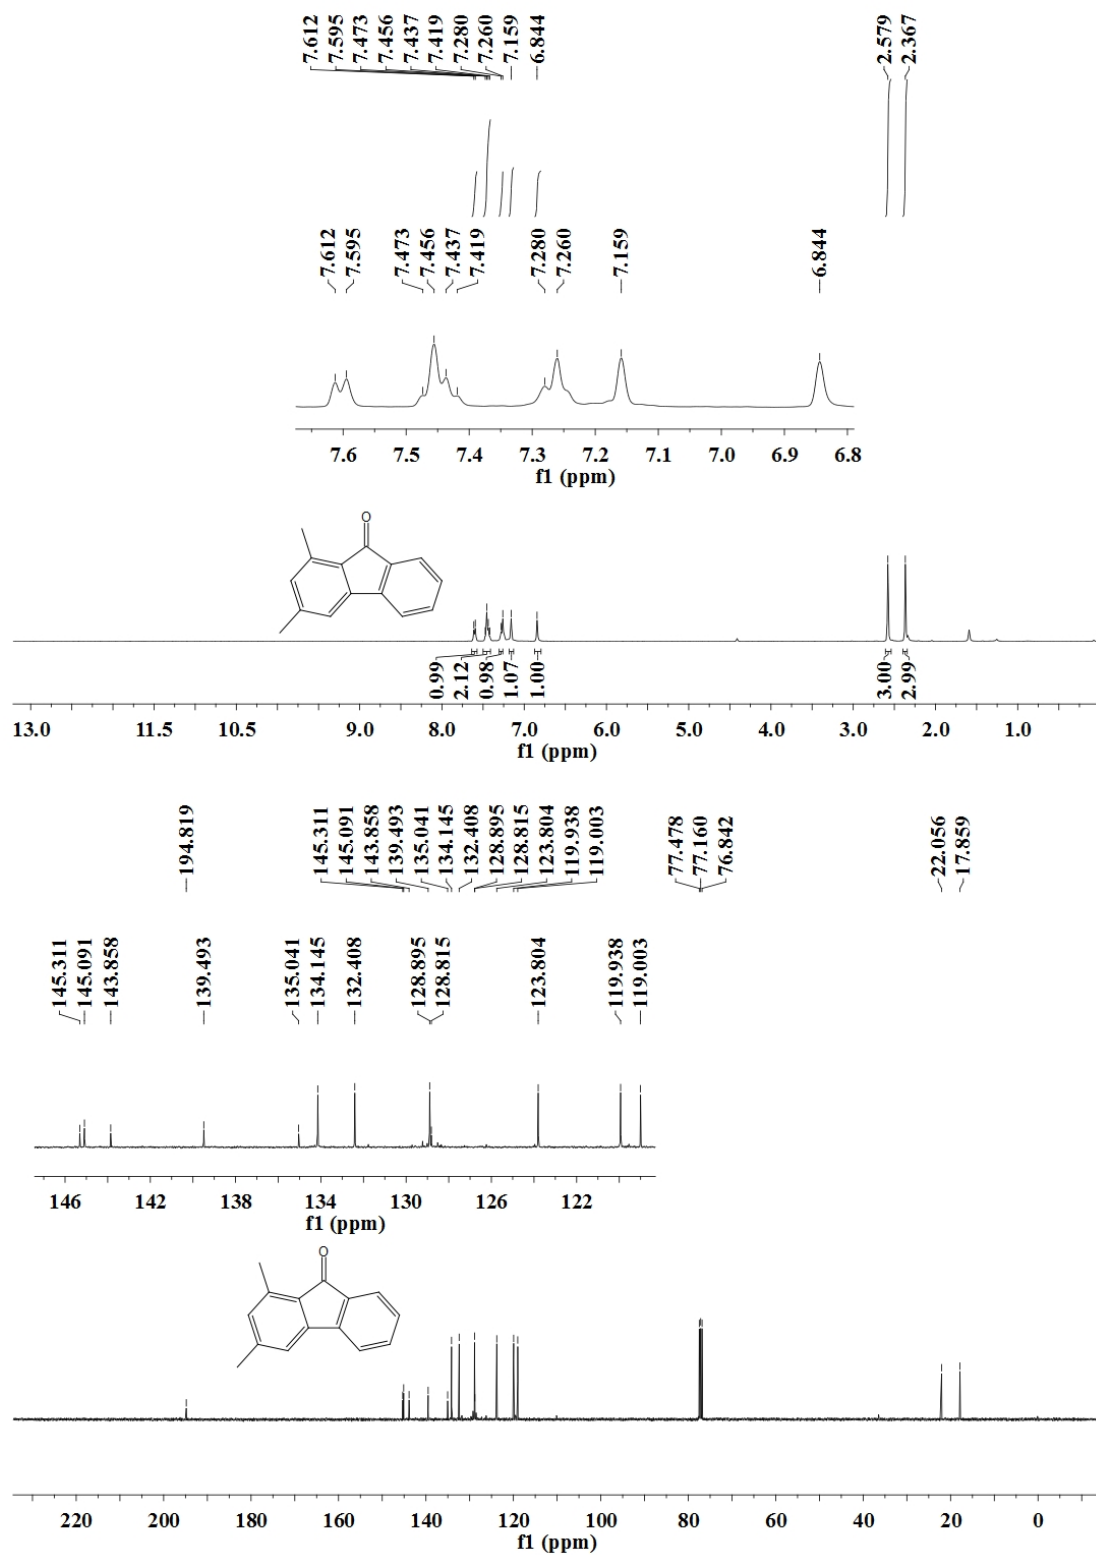

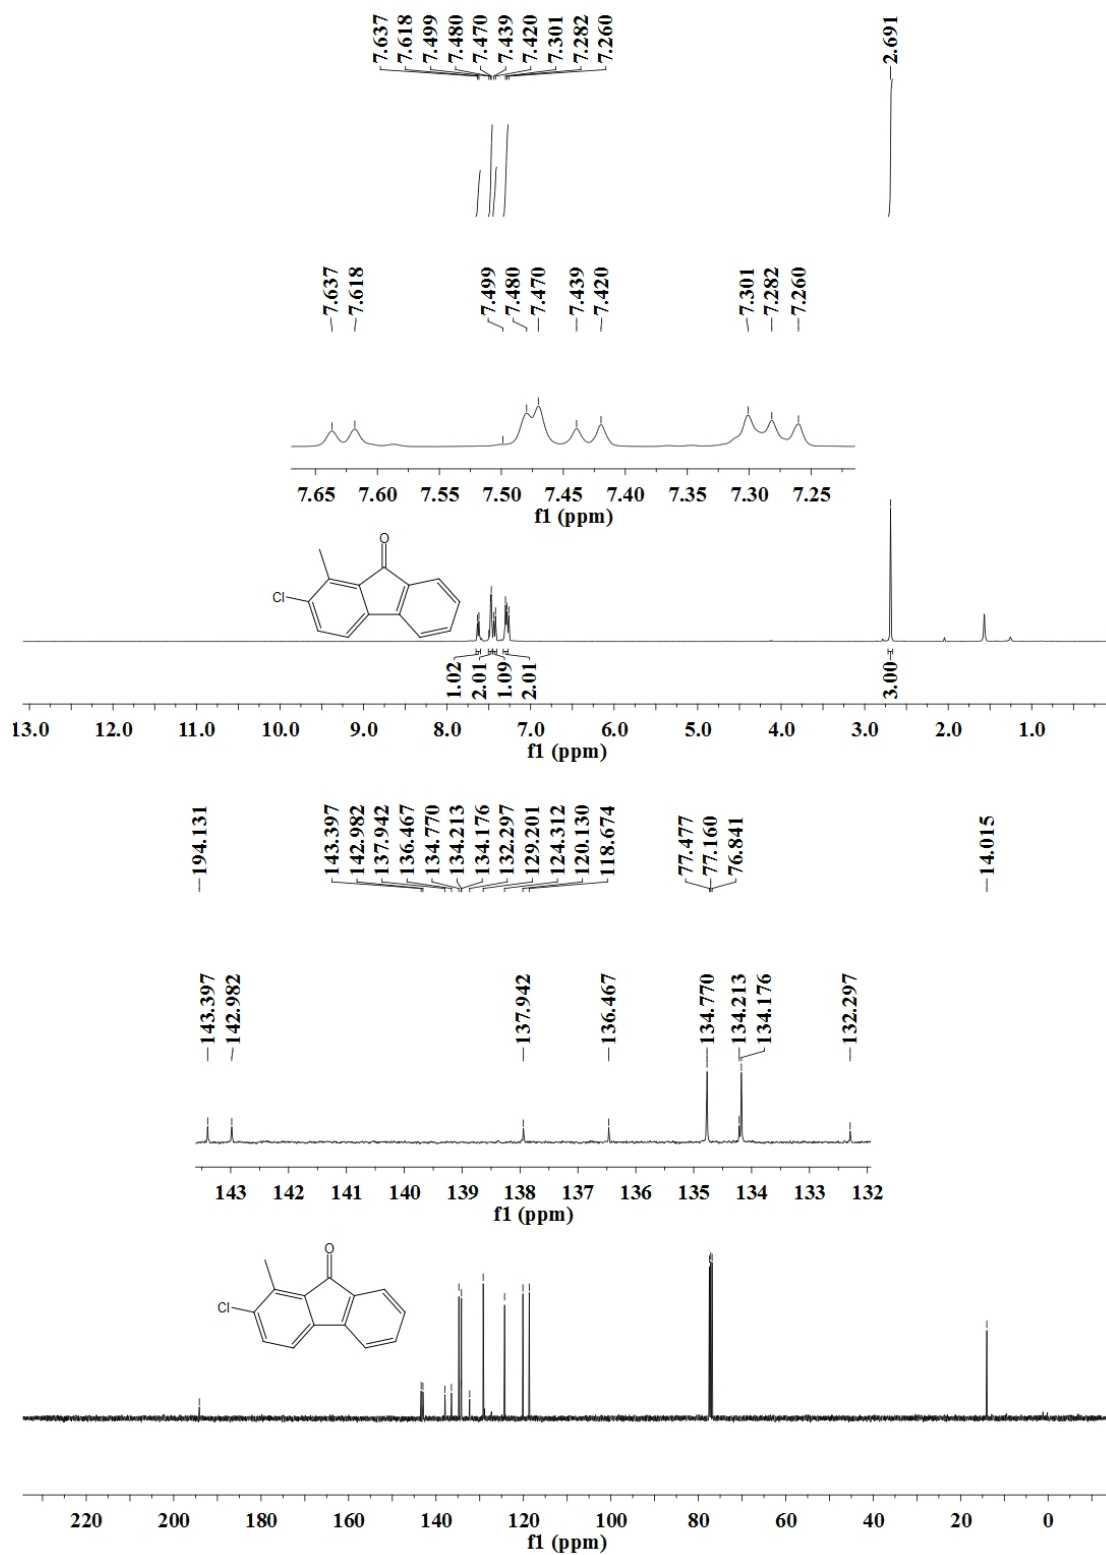

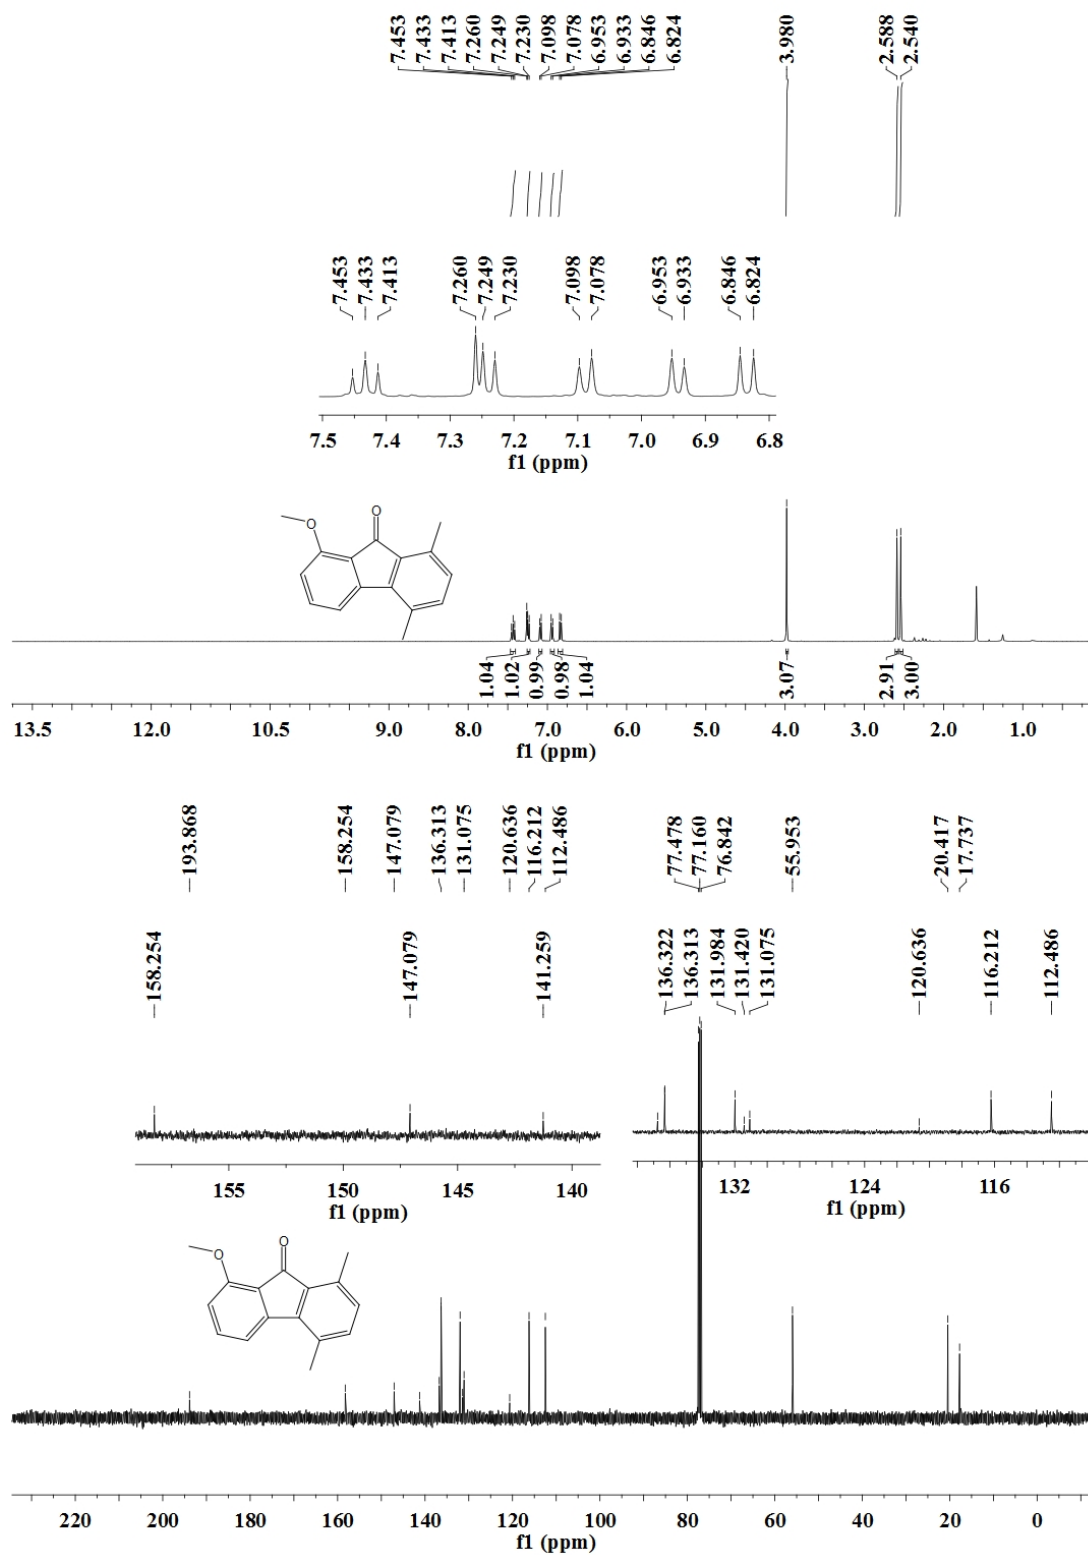



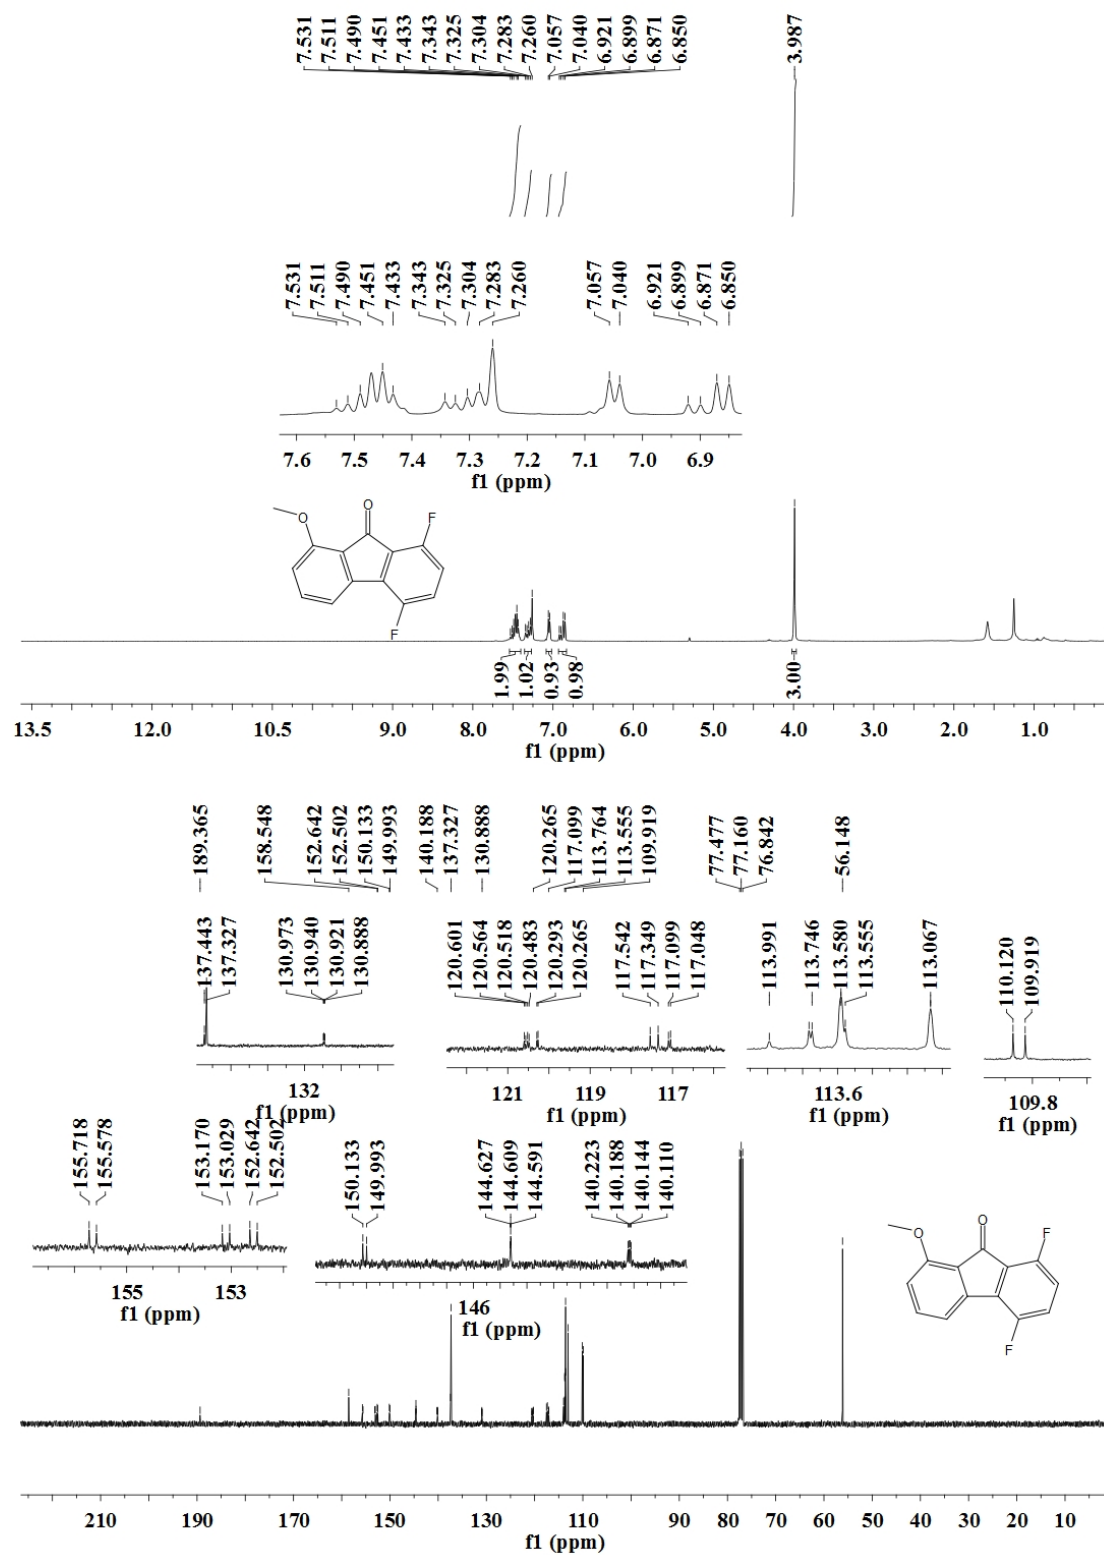

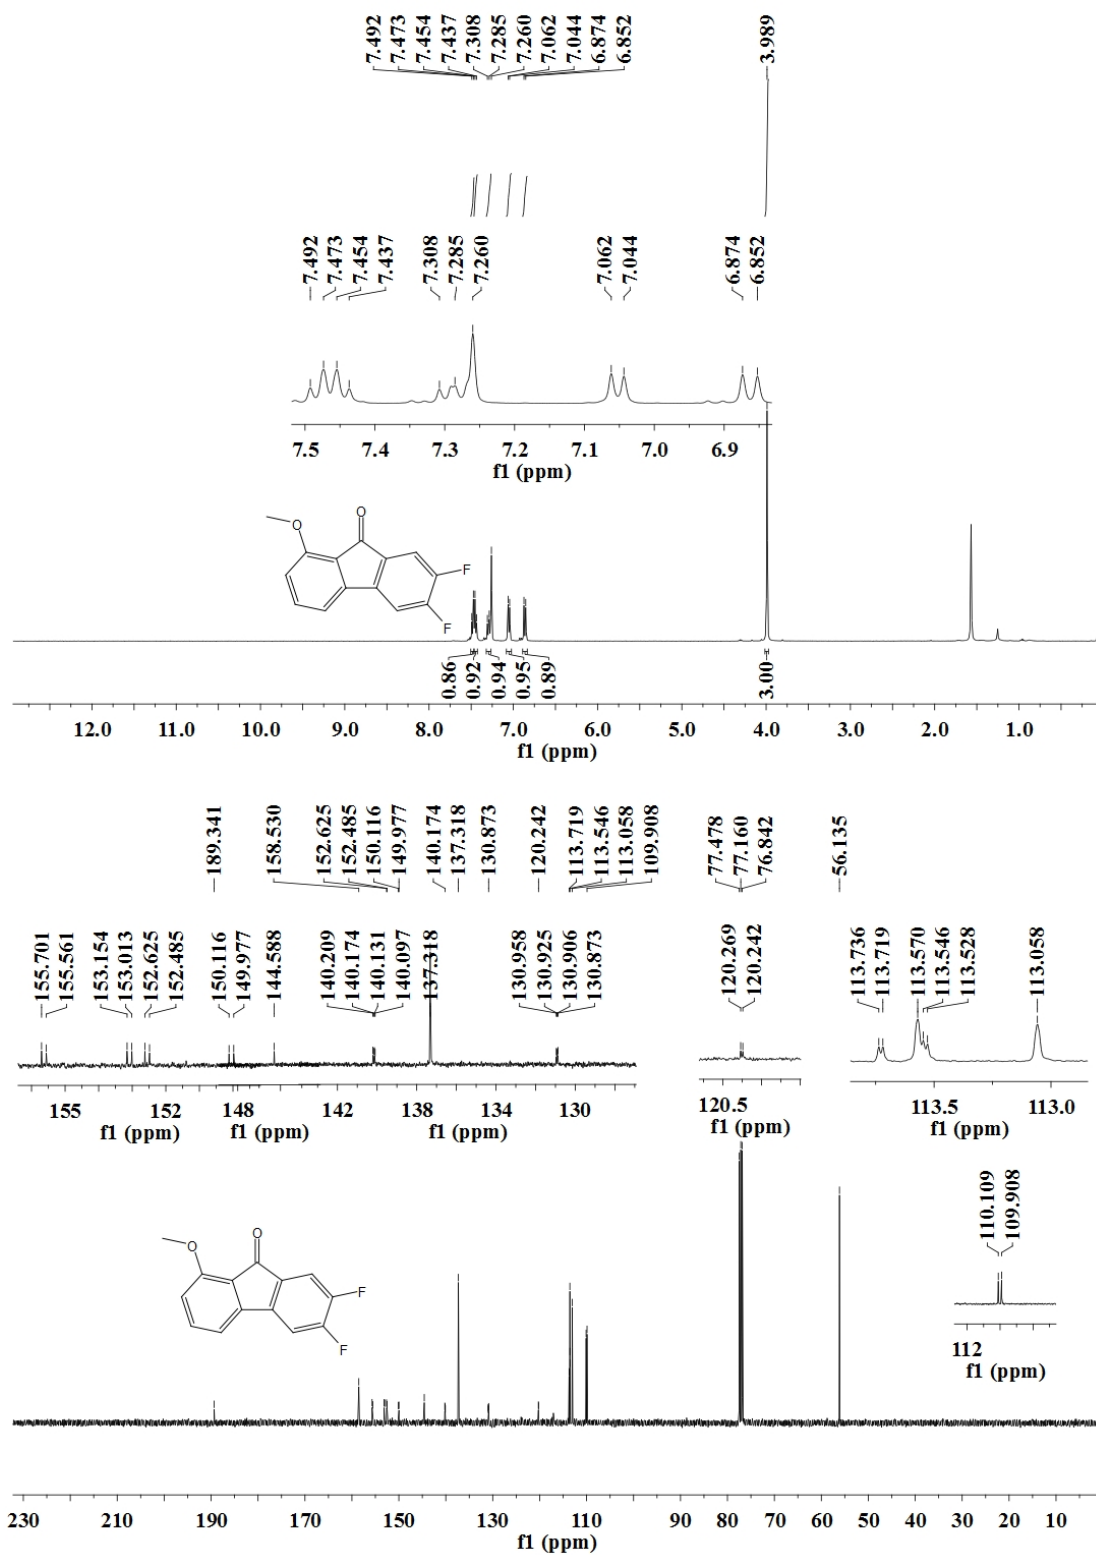

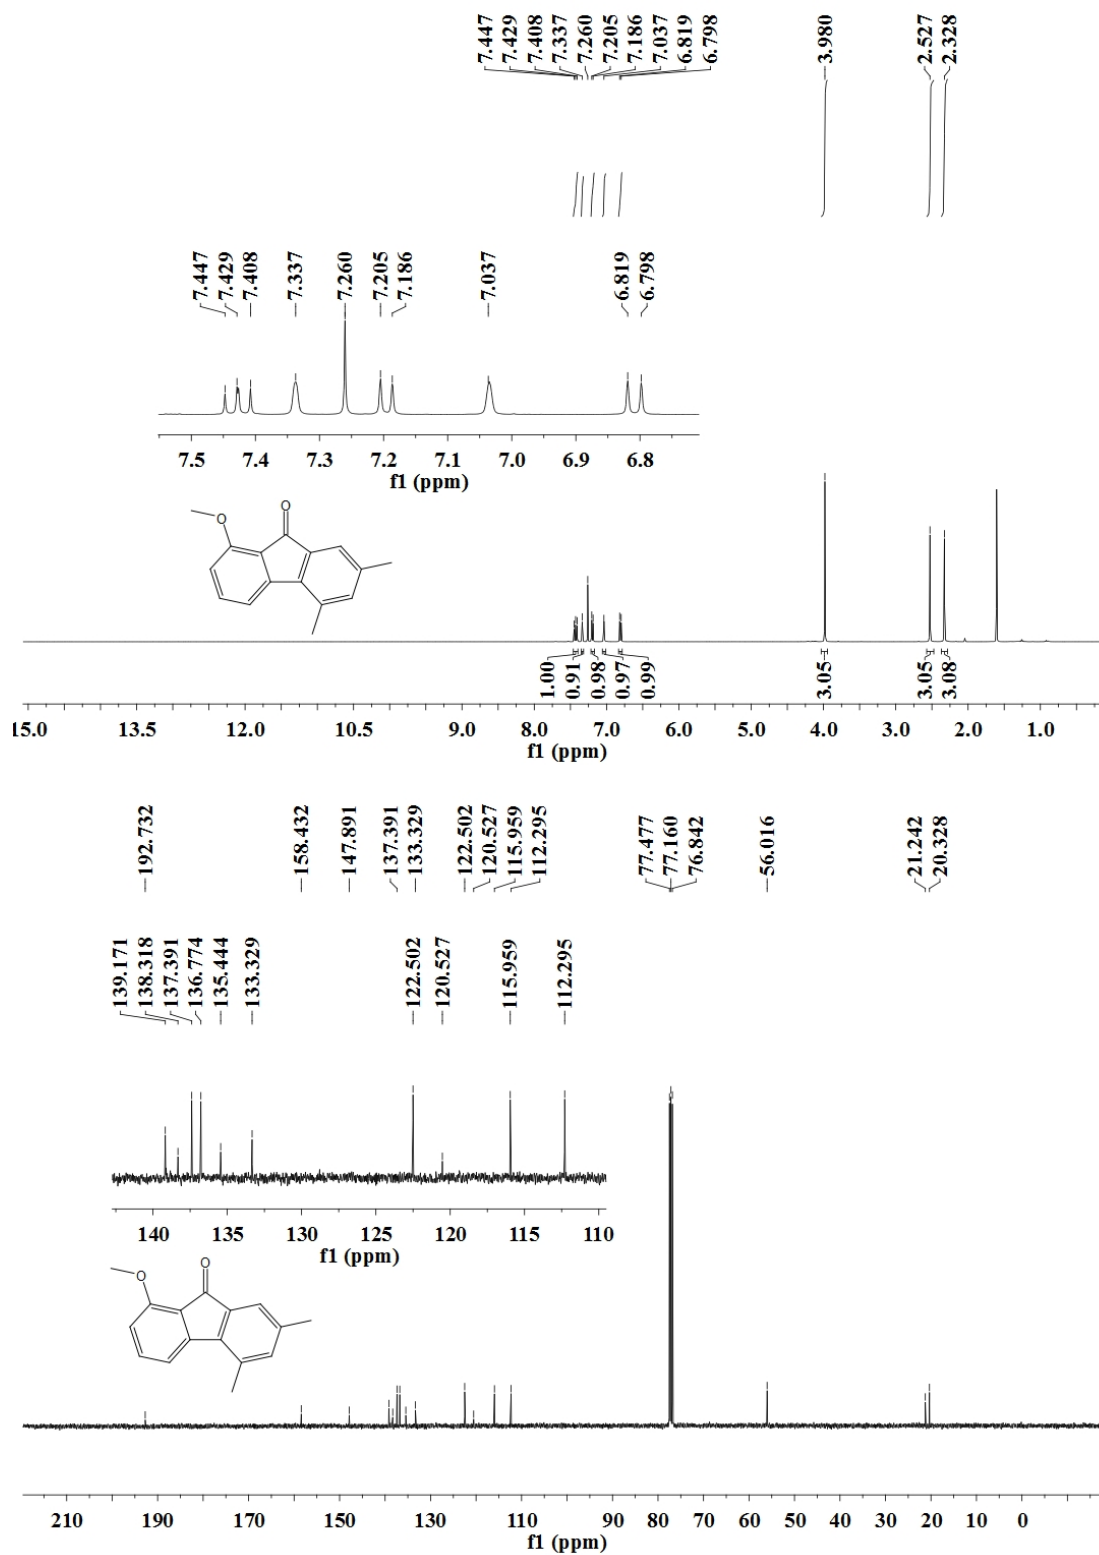

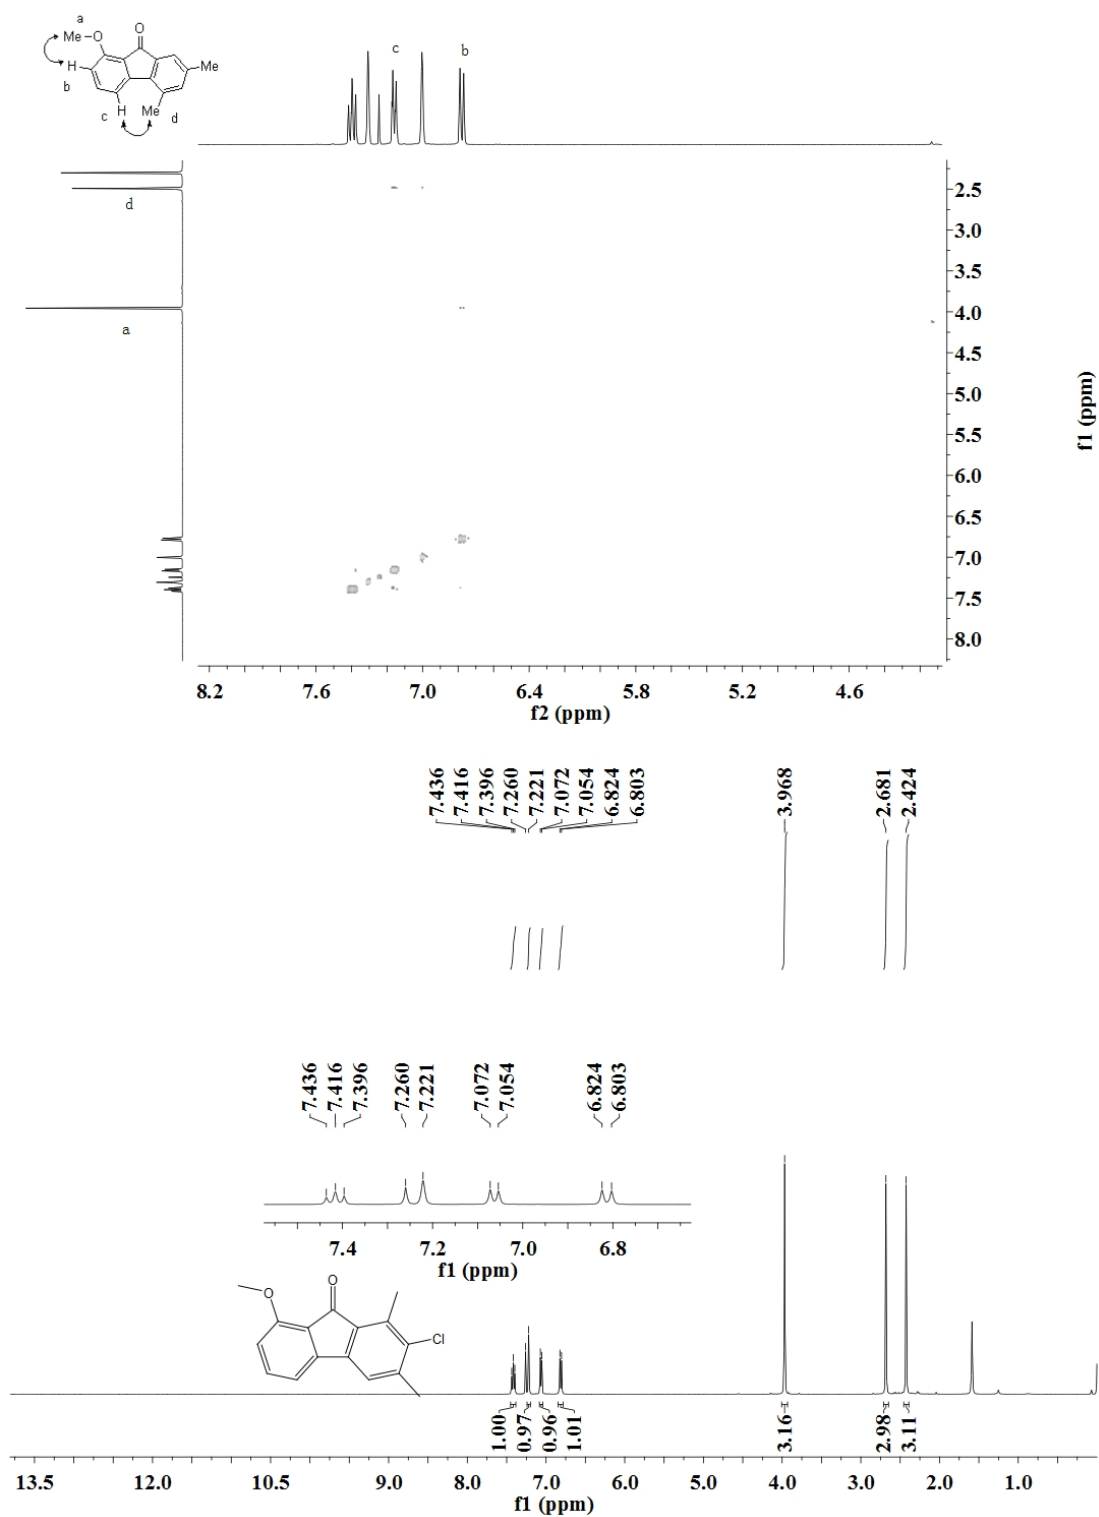

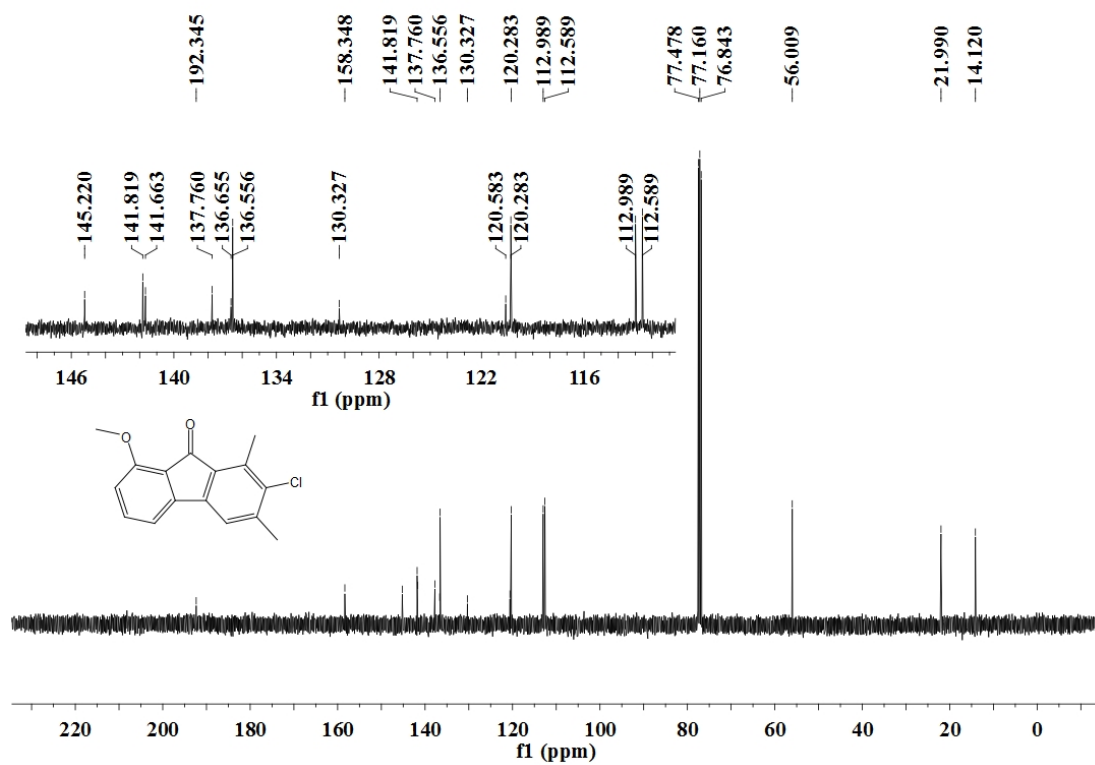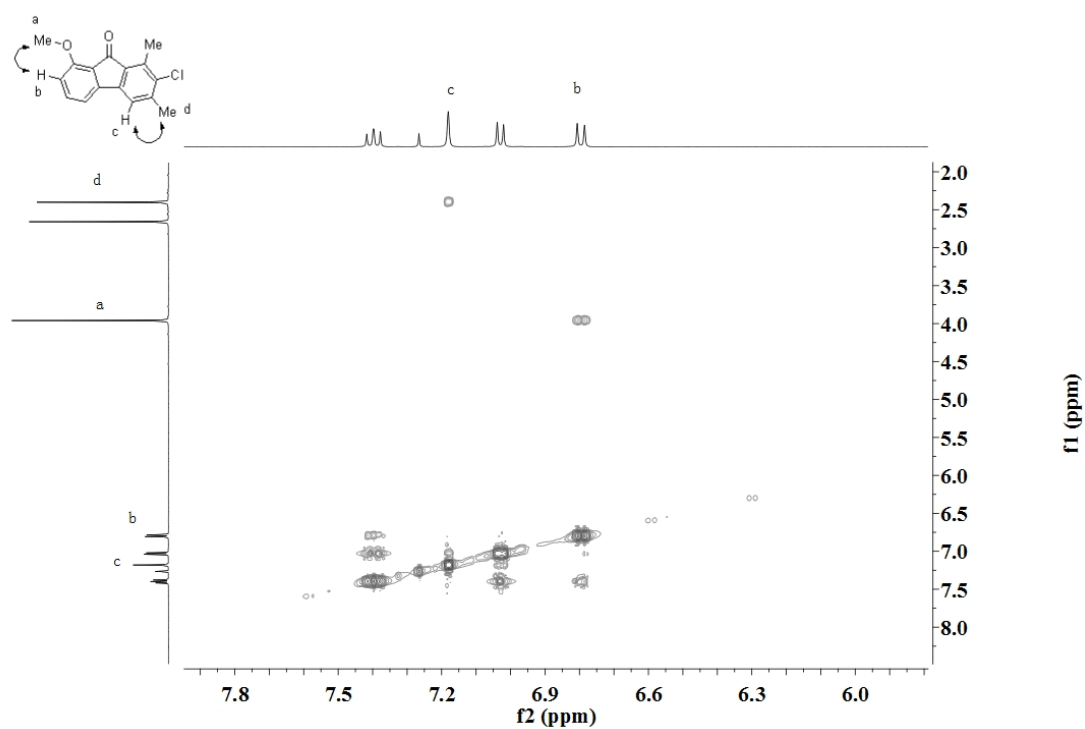

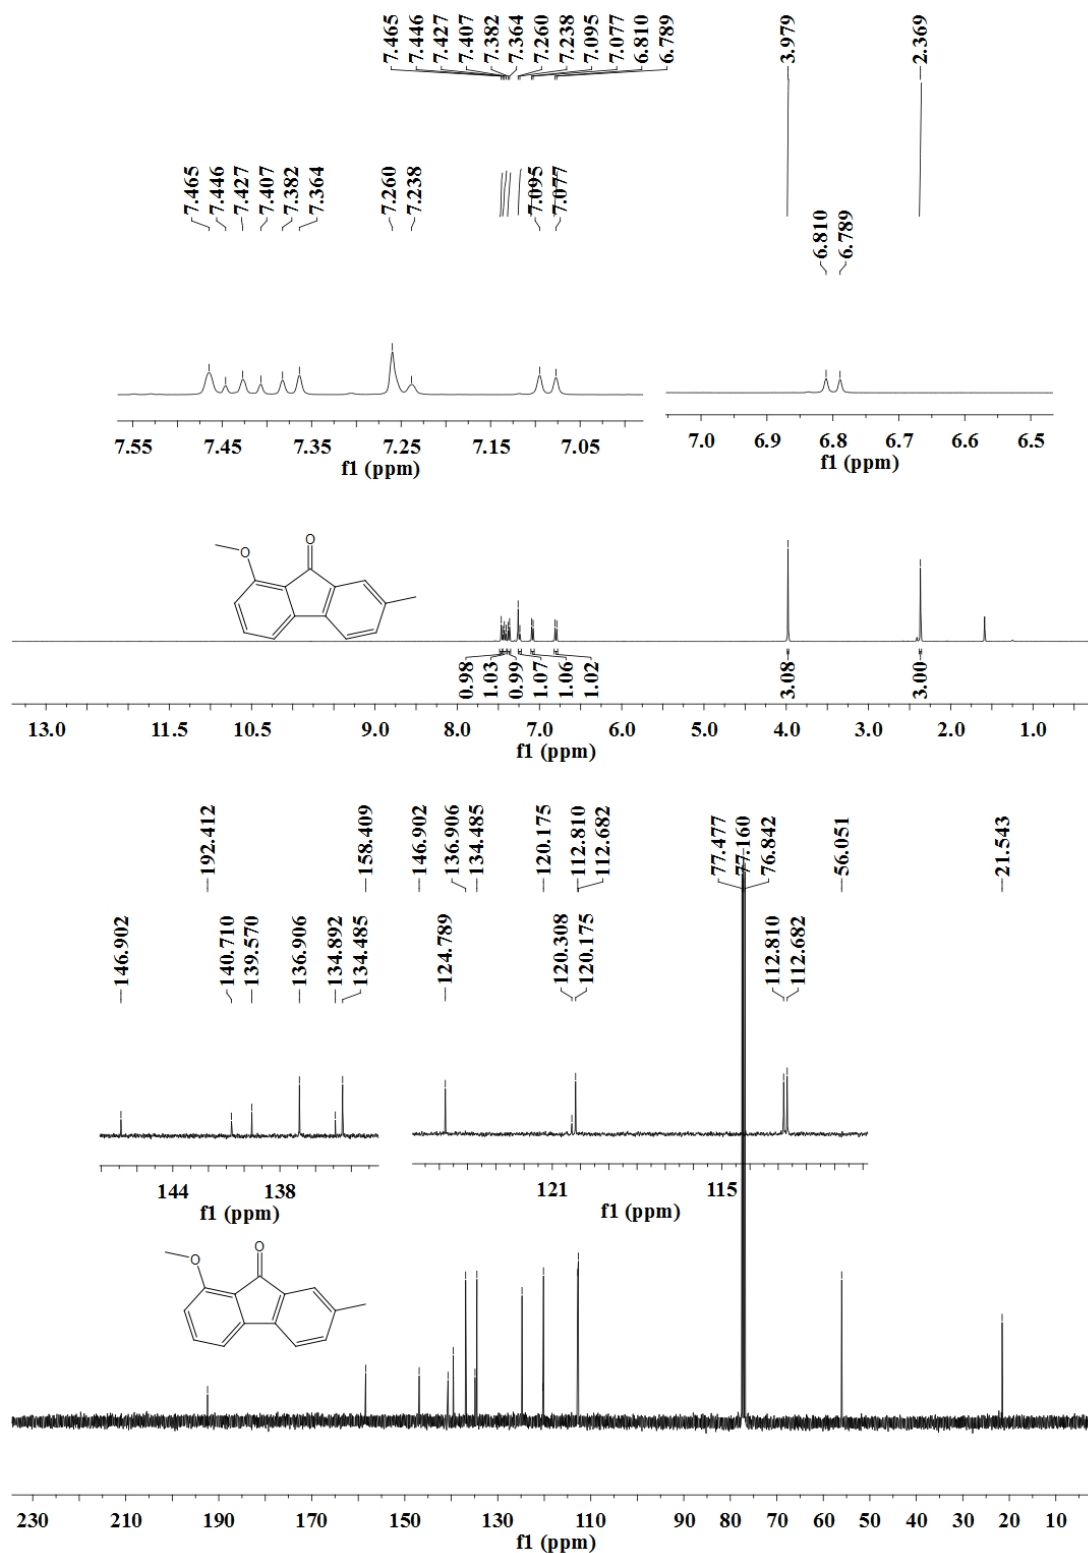

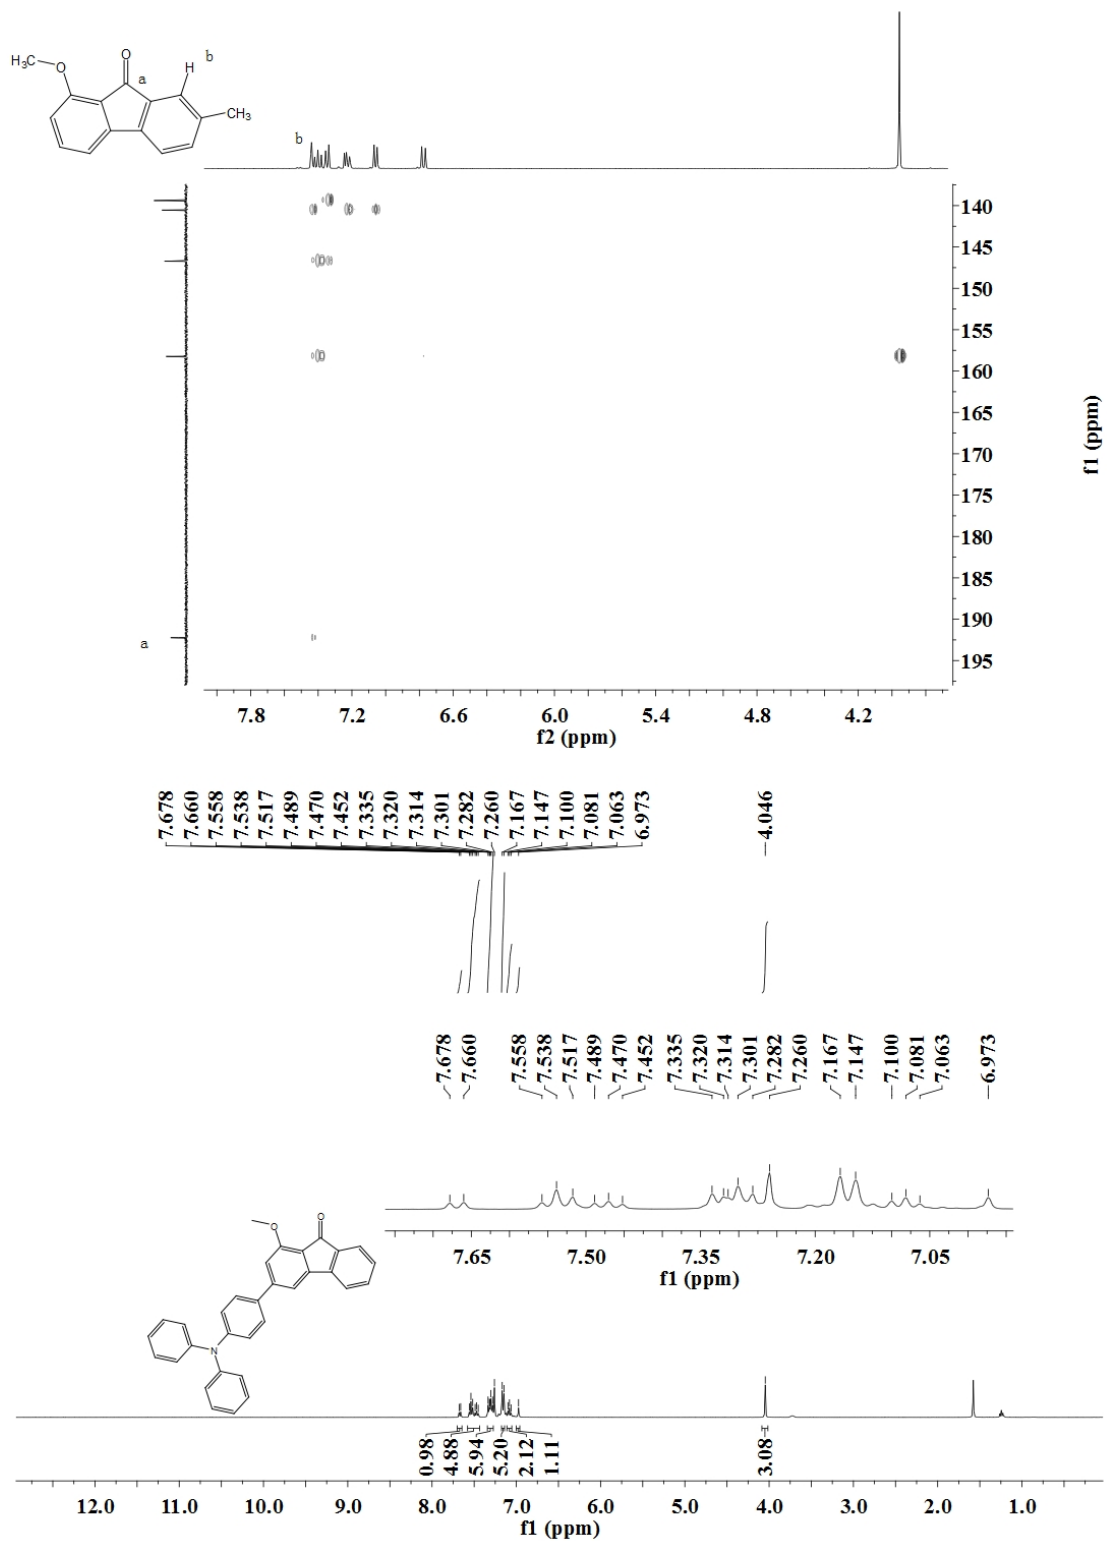

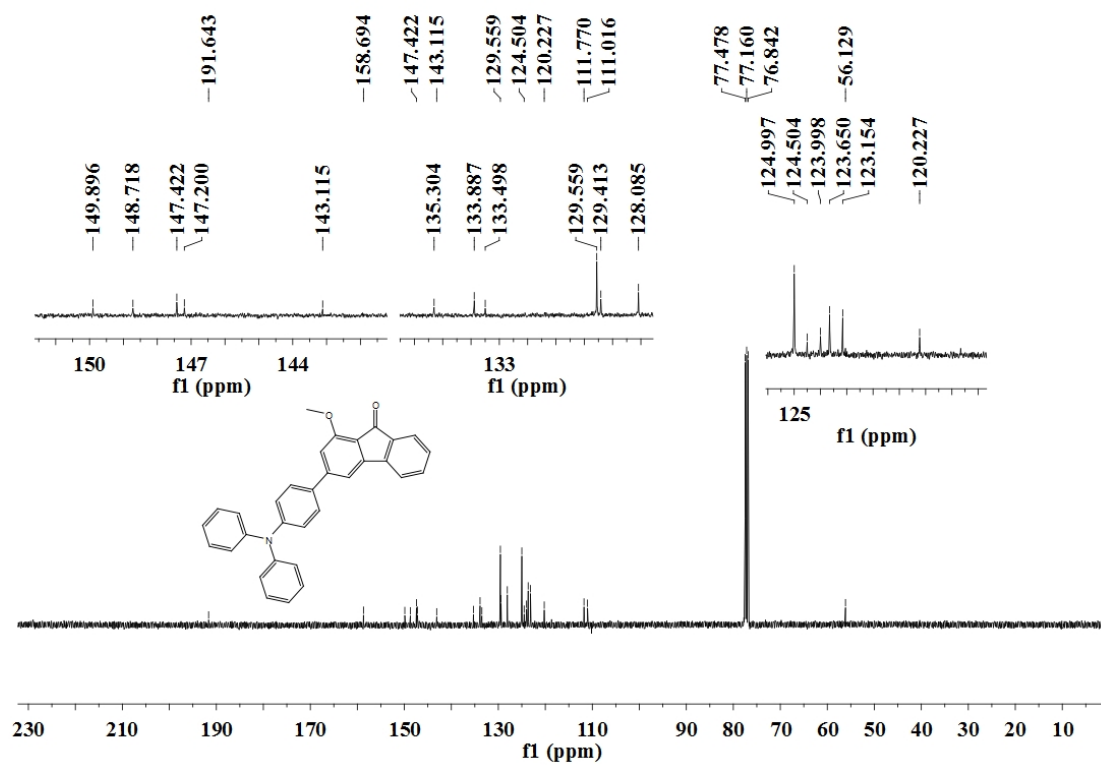

Supplement: c6cc00103c1.pdf [file c6cc00103c1.pdf]
